# Supplementary material for: Phytochemical on-line screening and in silico study of Helianthemum confertum: antioxidant activity, DFT, MD simulation, ADME/T analysis, and xanthine oxidase binding
Source: Royal Society of Chemistry journal article supplement (doi:10.1039/d4ra02540g), 2024-01-01
Supplement: d4ra02540g1.pdf [file d4ra02540g1.pdf]

## Phytochemical on-line screening and *in silico* study of *Helianthemum confertum*: antioxidant activity, DFT, MD simulation, ADME/T analysis and xanthine oxidase binding

Yasmine Chemam<sup>a,b,c\*</sup>, Samir Benayache<sup>a</sup>, Abdeslem Bouzina<sup>c</sup>, Eric Marchioni<sup>b</sup>, Omar sekiou<sup>d</sup>, Houria Bentoumi<sup>c</sup>, Minjie Zhao<sup>b</sup>, Zihad Bouslama<sup>d</sup>, Nour-Eddine Aouf<sup>c</sup> and Fadila Benayache<sup>a</sup>

<sup>a</sup>Unité de Recherche Valorisation des Ressources Naturelles, Molécules Bioactives et Analyses Physicochimiques et Biologiques, Université des Frères Mentouri, Constantine 1, Route d'Ain El Bey, 25000 Constantine, Algeria.

<sup>b</sup>Chimie Analytique des Molécules Bioactives, Institut Pluridisciplinaire Hubert Curien (UMR 7178 CNRS/UDS), 74 route du Rhin, 67400 Illkirch, France.

<sup>c</sup>Laboratory of Applied Organic Chemistry, Bioorganic Chemistry Group, Department of Chemistry, Sciences Faculty, Badji Mokhtar Annaba University, Box 12, 23000 Annaba, Algeria

<sup>d</sup>Environmental Research Center, Alzon Castle, Boughazi Said Street, PB 2024, Annaba 23000, Algeria.

### Molecule 1: Para-hydroxybenzoic acid

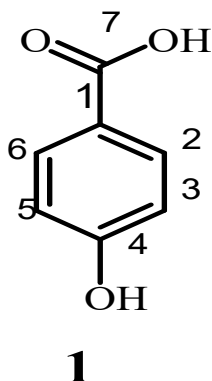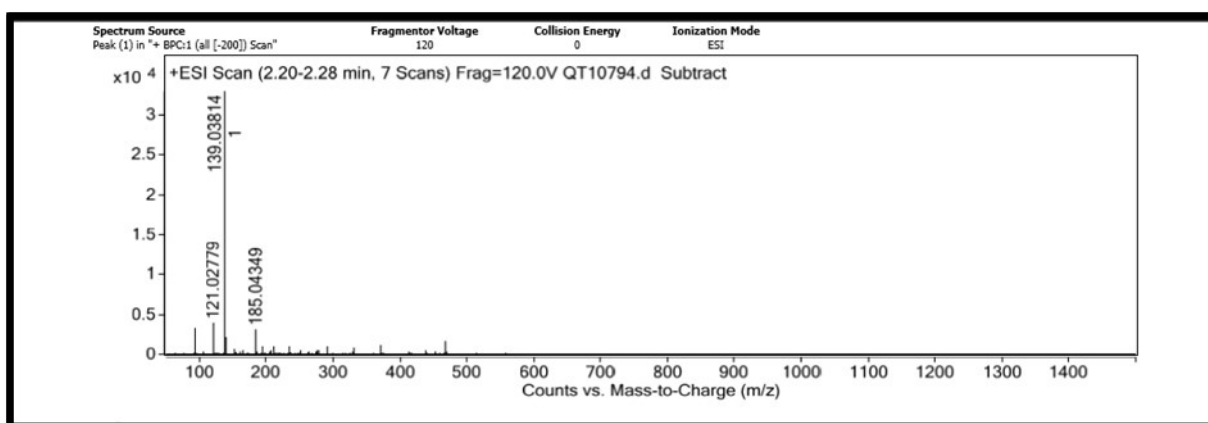

Figure.1.HRESI-MS (+) of para-hydroxybenzoic acid

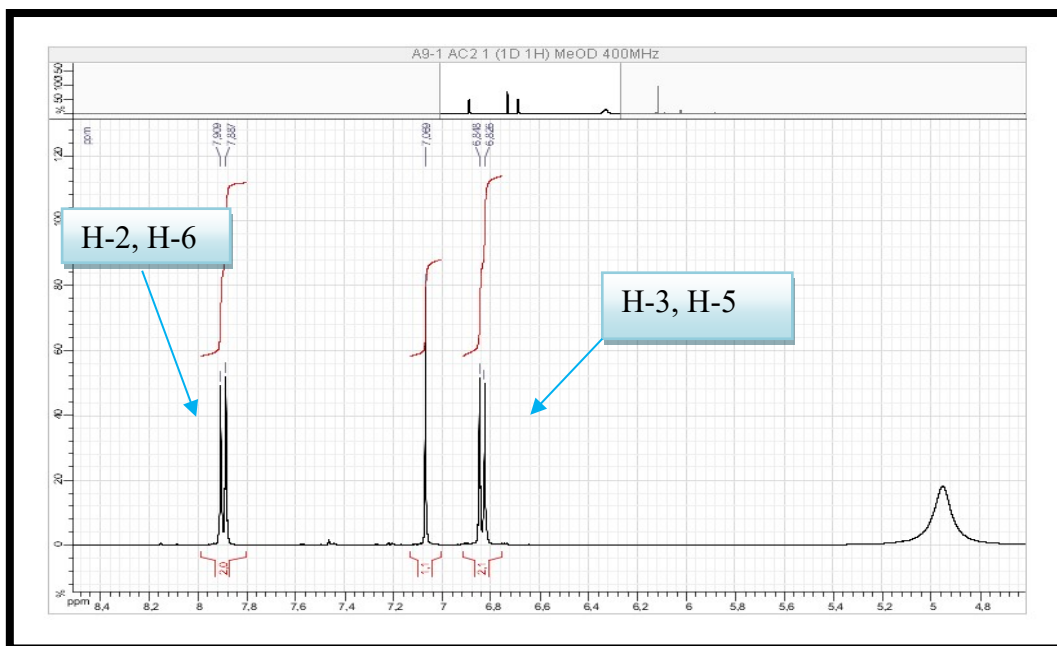

**Figure.2.**  $^1\text{H}$  NMR spectrum (400MHz,  $\text{CD}_3\text{OD}$ ,  $\delta\text{ppm}$ ) of para-hydroxybenzoic acid

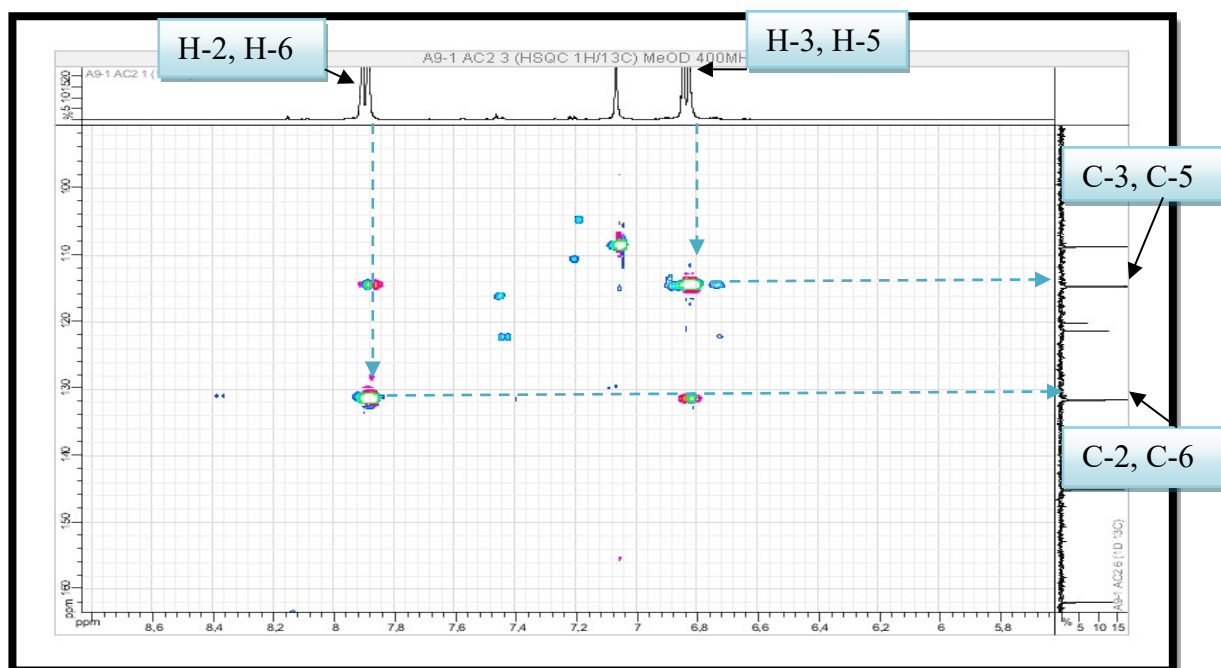

**Figure .3.** HSQC spectrum (400MHz,  $\text{CD}_3\text{OD}$ ,  $\delta\text{ppm}$ ) of para-hydroxybenzoic acid

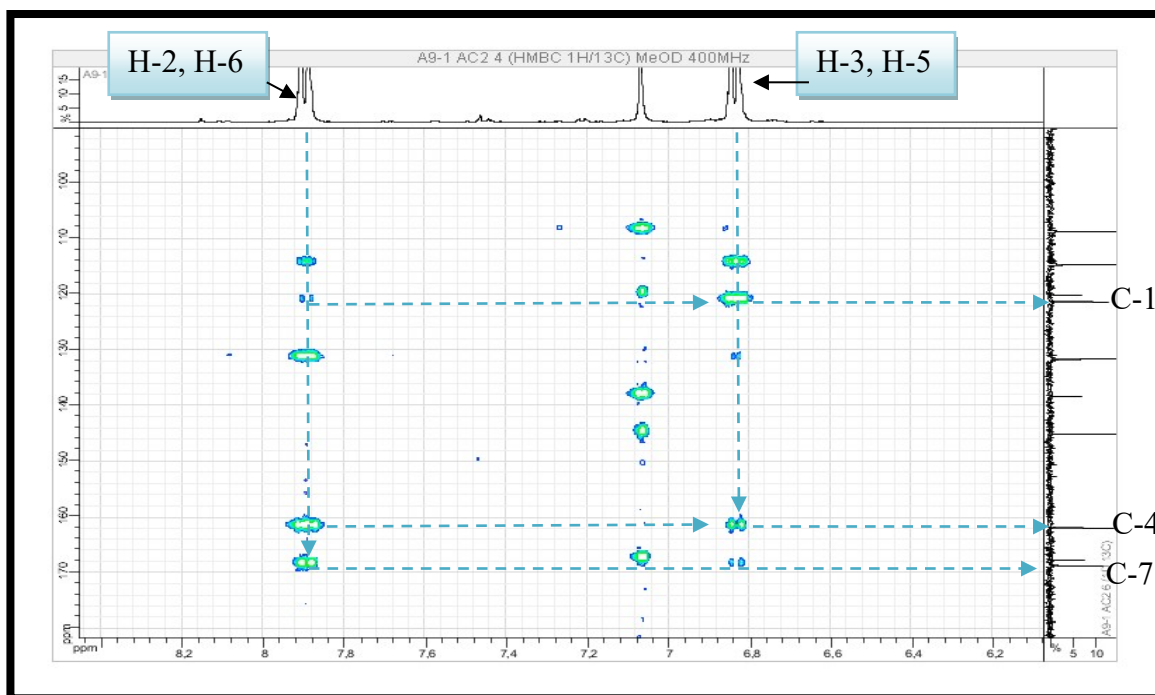

**Figure .4.**HMBC spectrum (400MHz, CD<sub>3</sub>OD, δppm) of para-hydroxybenzoic acid

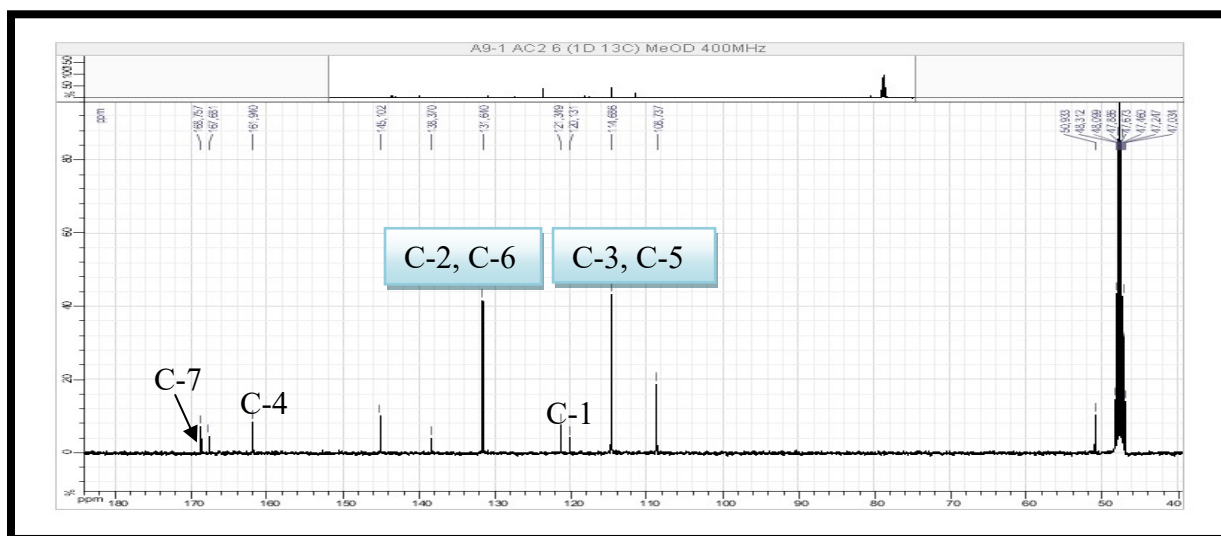

**Figure.5.** <sup>13</sup>C NMR spectrum (100MHz, CD<sub>3</sub>OD, δppm) of para-hydroxybenzoic acid

**Figure.5.** <sup>13</sup>C NMR spectrum (100MHz, CD<sub>3</sub>OD, δppm) of protocatechuic acid

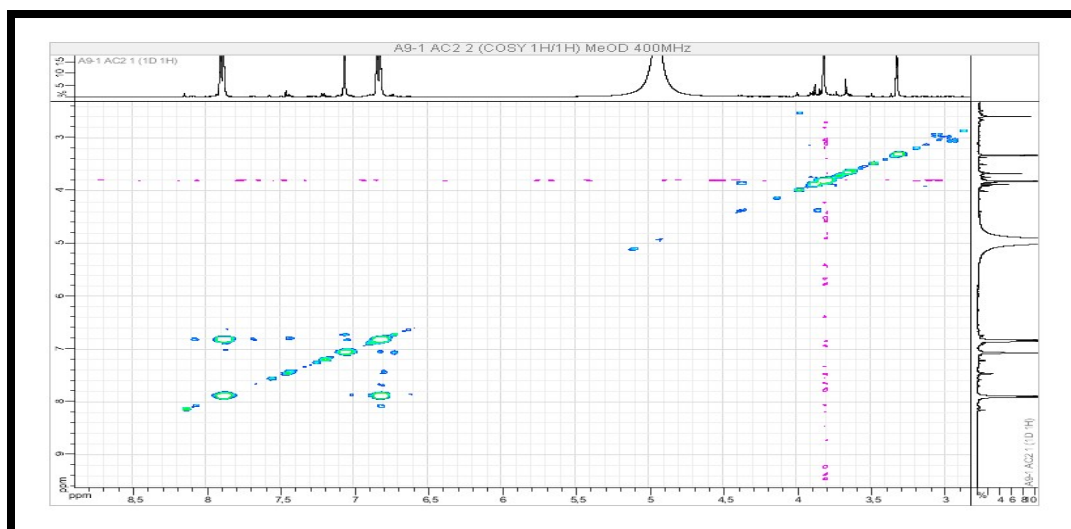

**Figure.6.** COSY spectrum (400MHz, CD<sub>3</sub>OD, δppm) of para-hydroxybenzoic acid

## Molecule 2: Methyl gallate

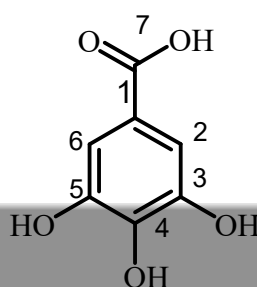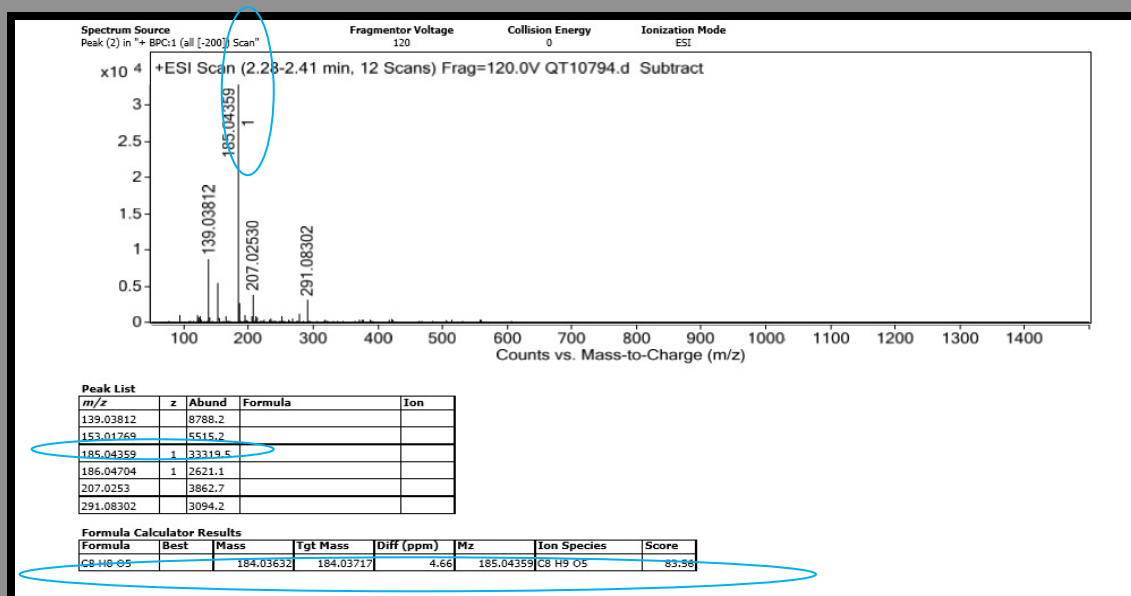

**Figure.7.** HRESI-MS (+) of methyl gallate

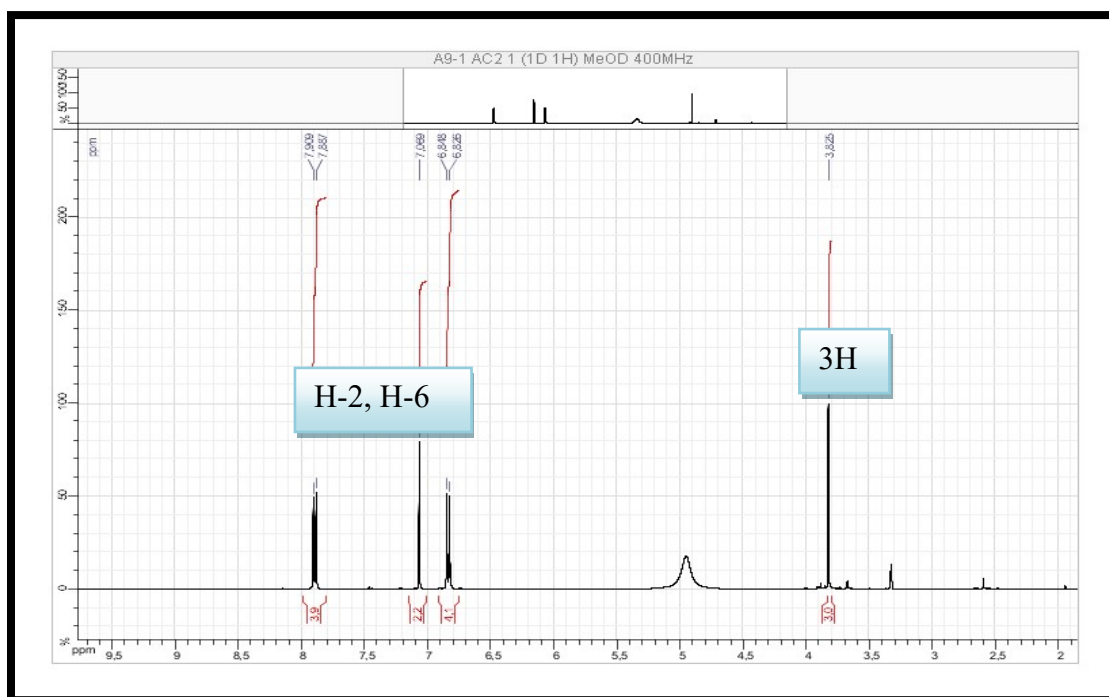

**Figure.8.**  $^1\text{H}$  NMR spectrum (spreading out 2) (400MHz,  $\text{CD}_3\text{OD}$ ,  $\delta\text{ppm}$ ) of methyl gallate

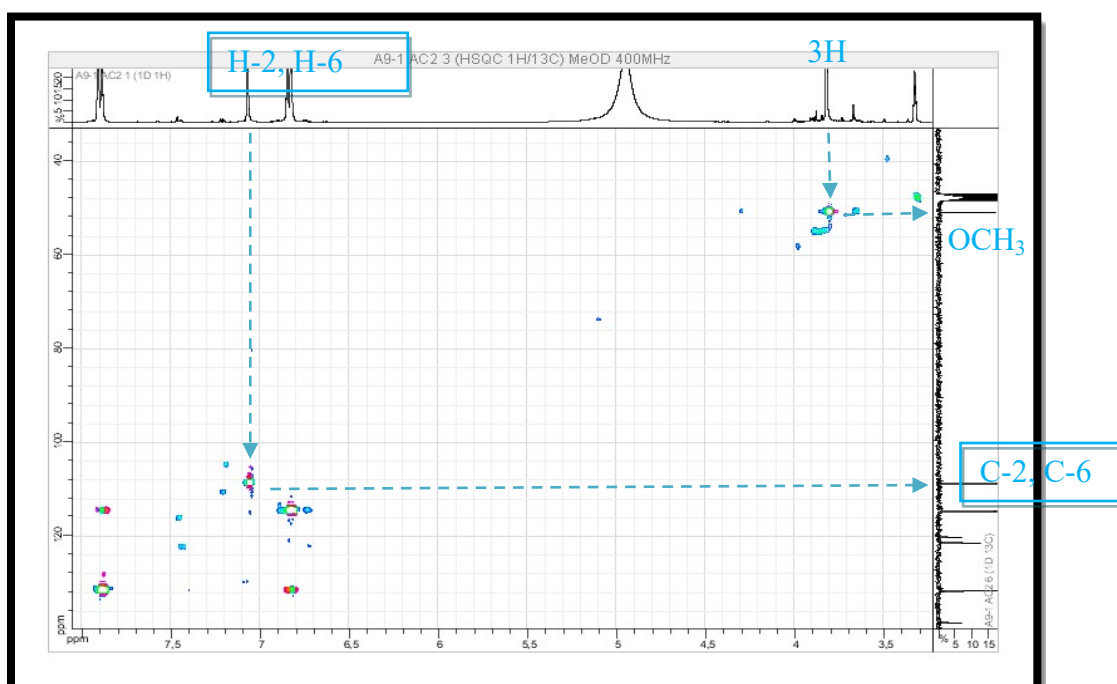

**Figure .9.** HSQC spectrum (spreading out 2) (400MHz,  $\text{CD}_3\text{OD}$ ,  $\delta\text{ppm}$ ) of methyl gallate

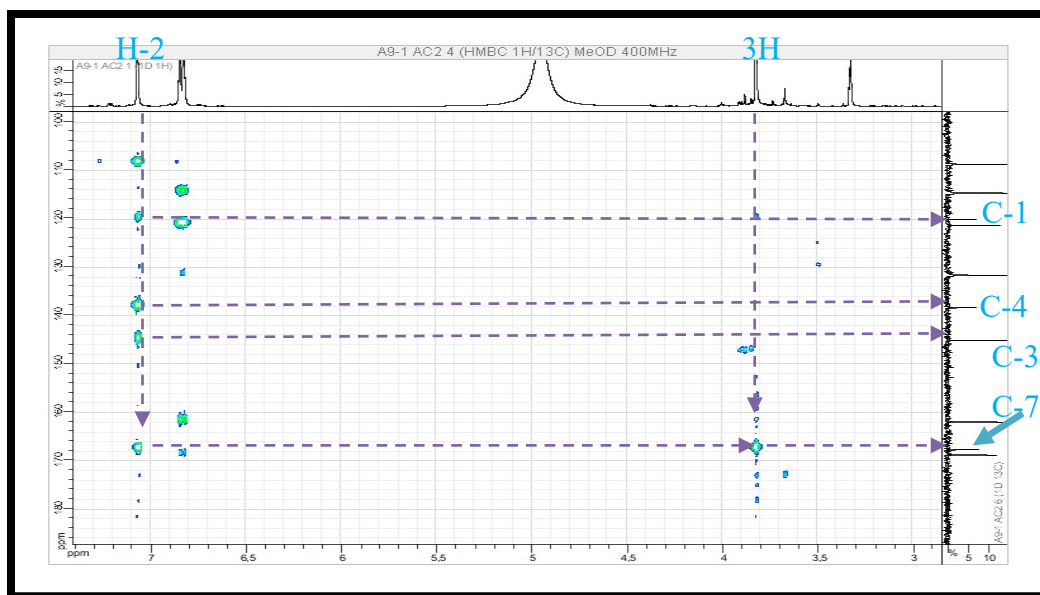

**Figure .10.**HMBC spectrum (spreading out 2) (400MHz, CD<sub>3</sub>OD, δppm) of methyl

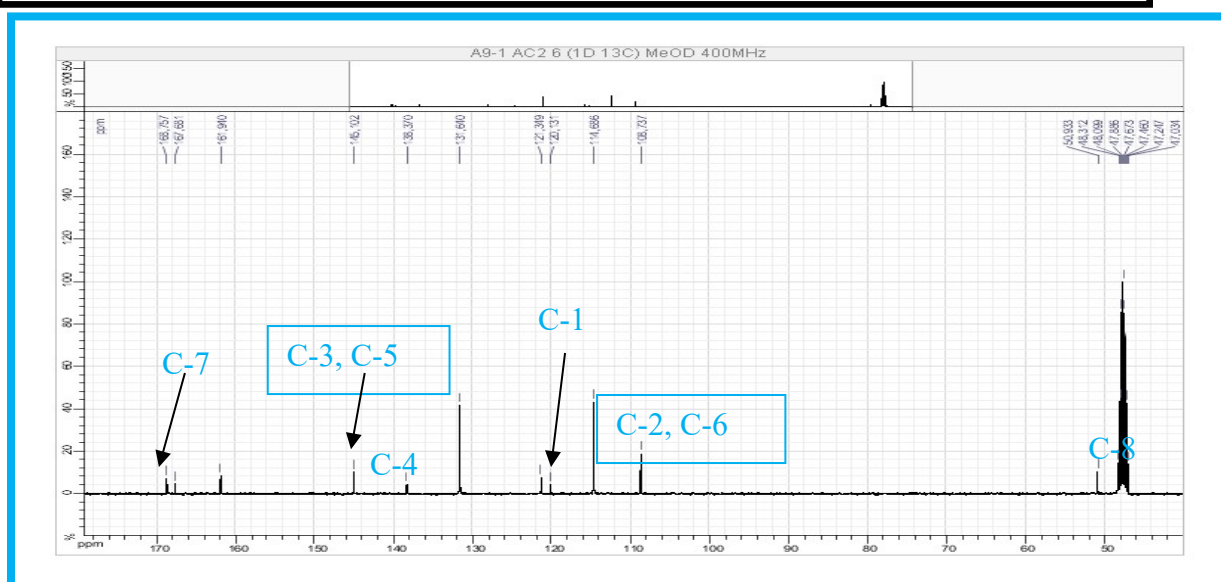

**Figure.11.** <sup>13</sup>C NMR spectrum (spreading out 2) (100MHz, CD<sub>3</sub>OD, δppm) of methyl gallate

**Molecule 3:** Protocatechuic acid

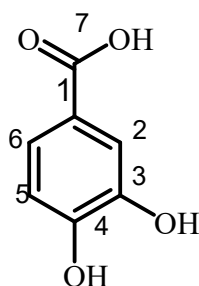

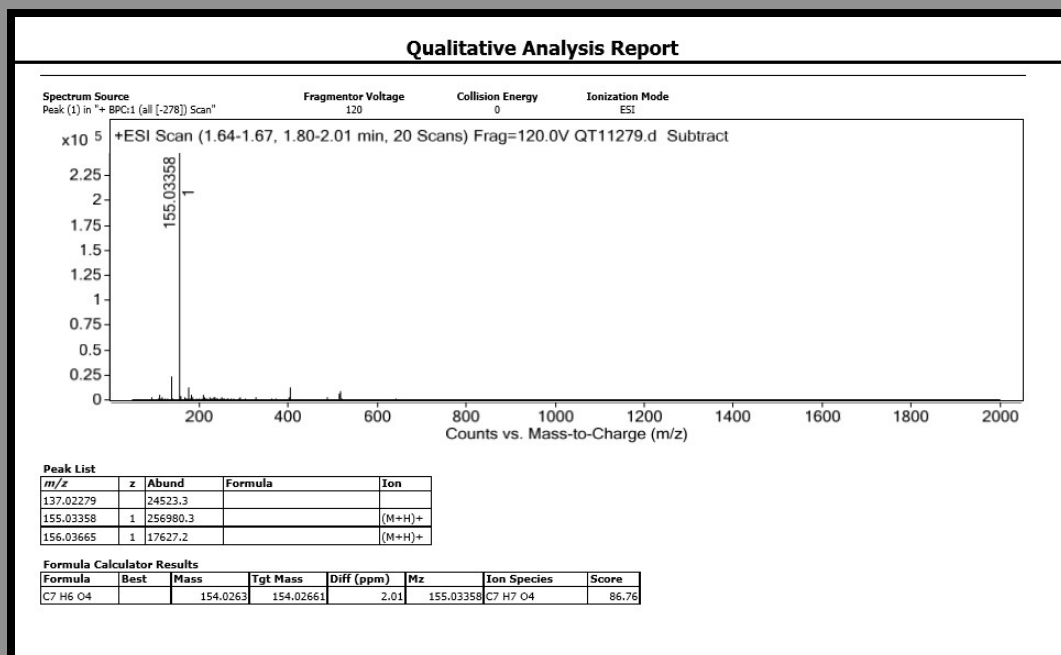

**Figure.12.** HRESI-MS (+) of Protocatechuic acid

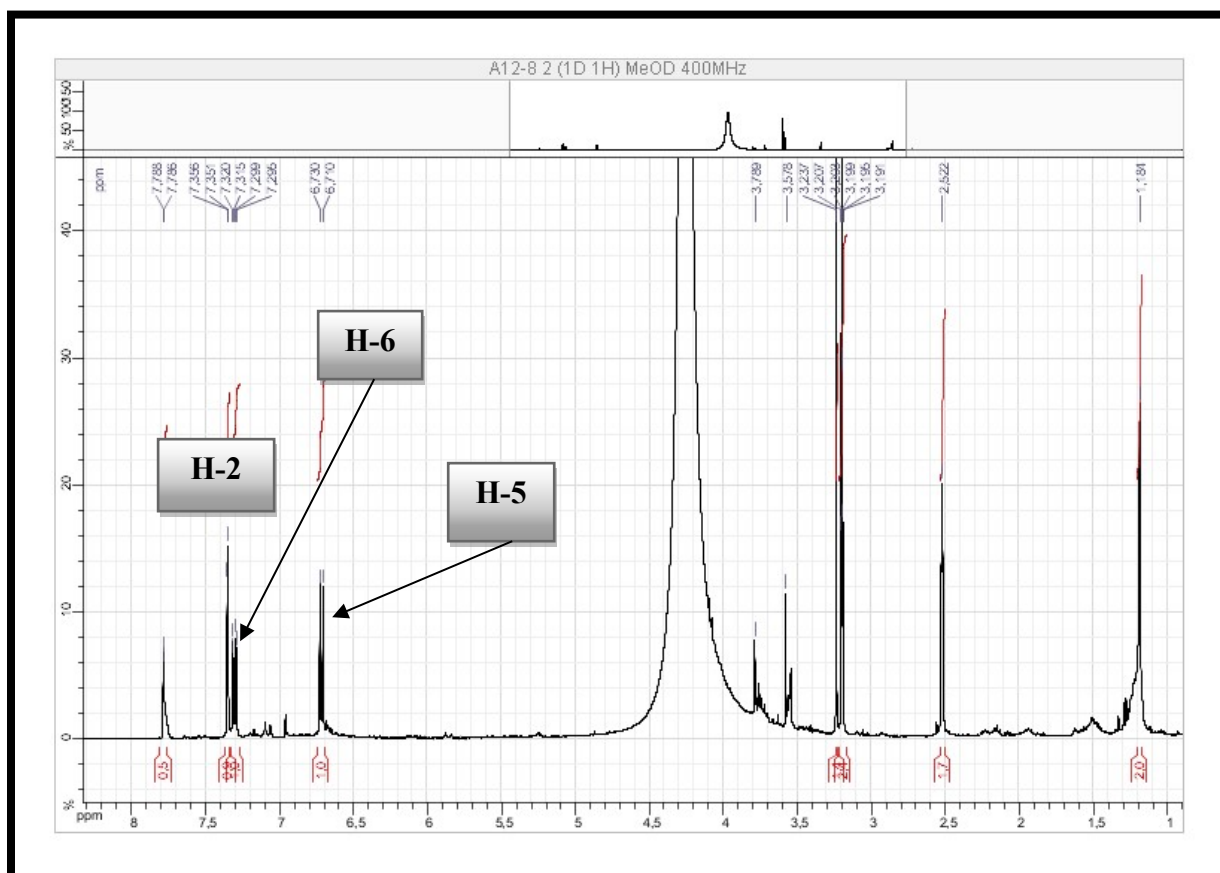

**Figure.13.** <sup>1</sup>H NMR spectrum (400MHz, CD<sub>3</sub>OD, δppm) of protocatechuic acid

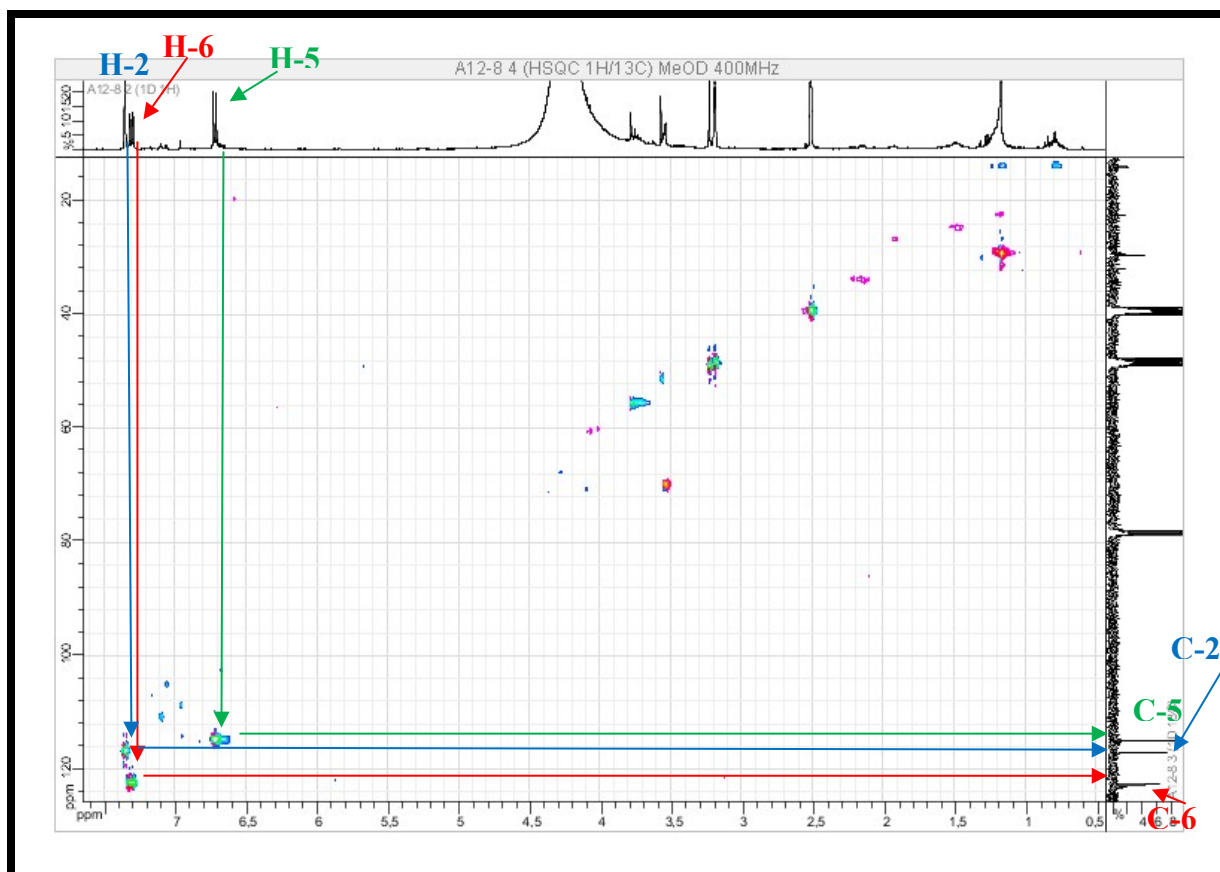

**Figure.14.** HSQC spectrum (400MHz, CD<sub>3</sub>OD, δppm) of protocatechuic acid



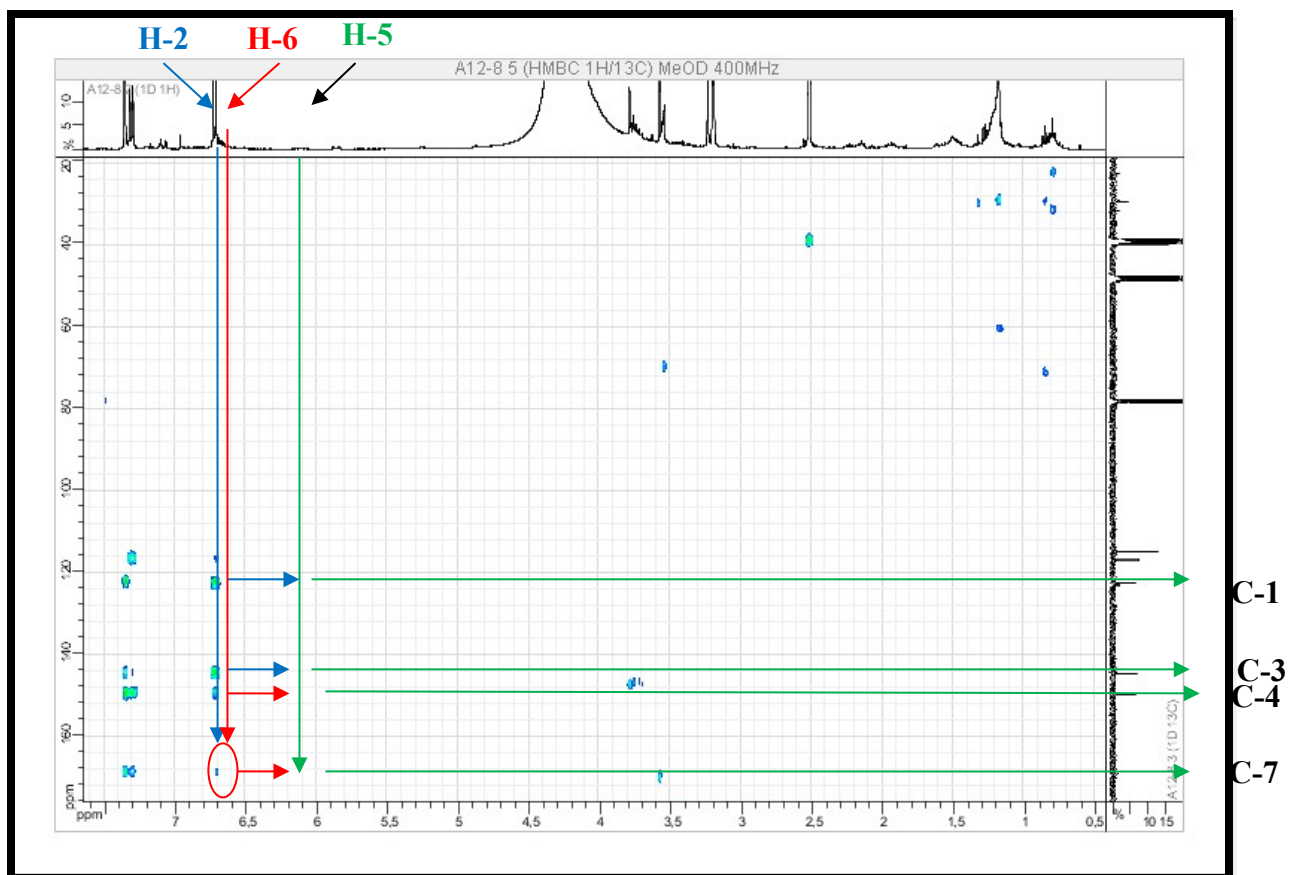

**Figure .15.**HMBC spectrum (400MHz,  $\text{CD}_3\text{OD}$ ,  $\delta\text{ppm}$ ) of protocatechuic acid

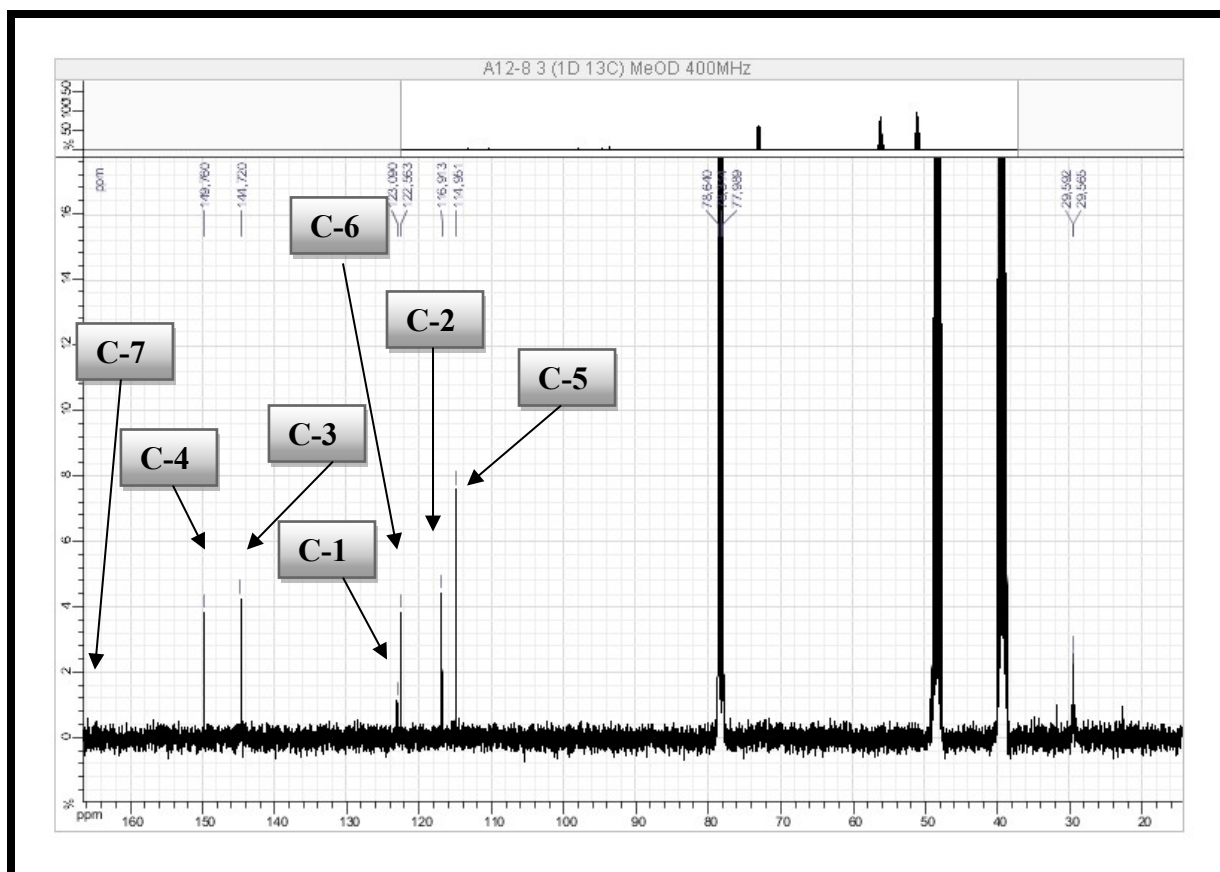

**Figure.16.**  $^{13}\text{C}$  NMR spectrum (100MHz,  $\text{CD}_3\text{OD}$ ,  $\delta\text{ppm}$ ) of protocatechuic acid

#### Molecule 4 : Astragalin

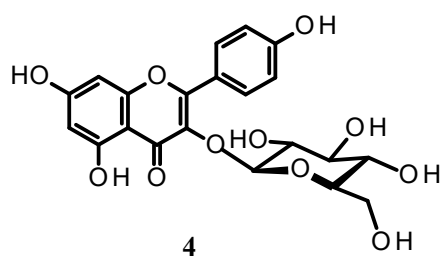

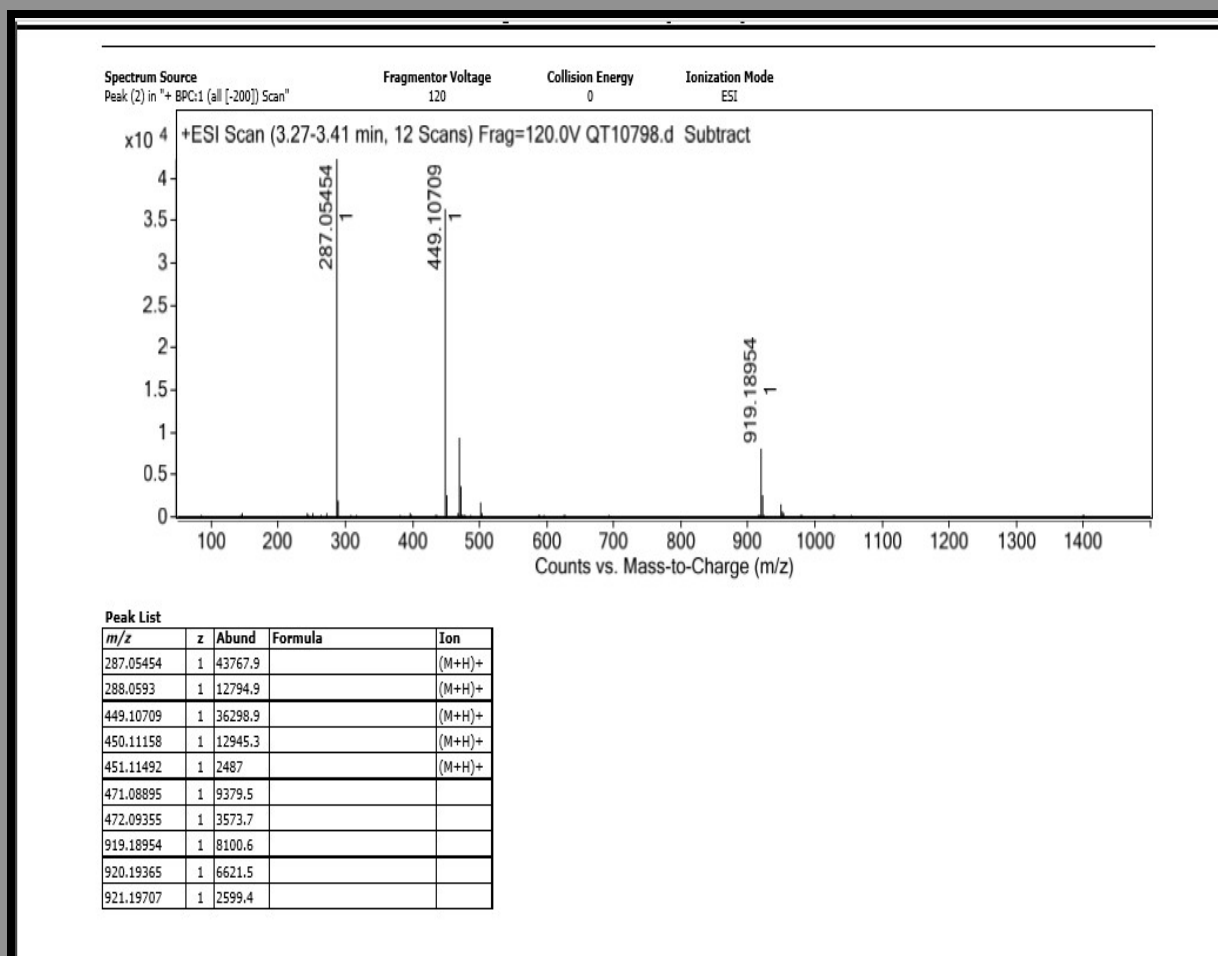

Figure.17. HRESI-MS (+) of astragalin

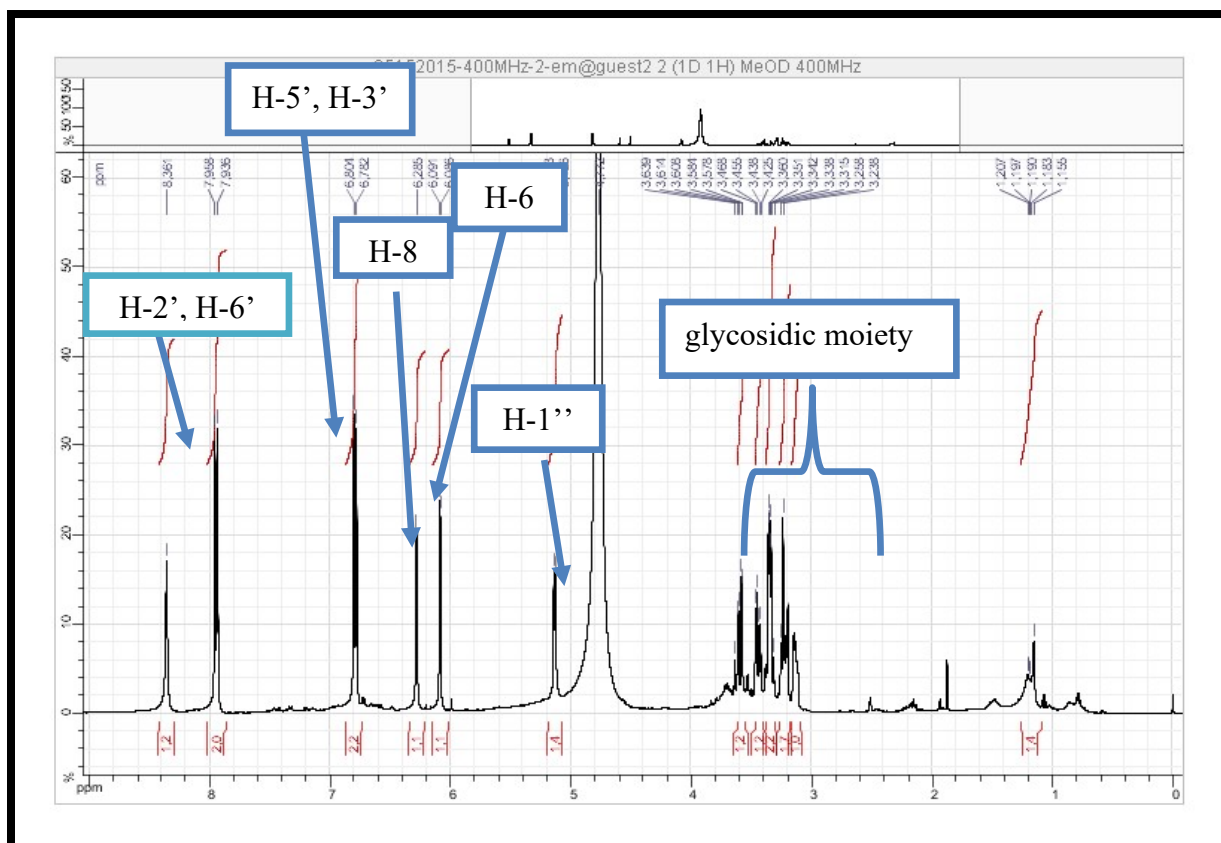

**Figure.18.**  $^1\text{H}$  NMR spectrum (400MHz,  $\text{CD}_3\text{OD}$ ,  $\delta\text{ppm}$ ) of astragaline

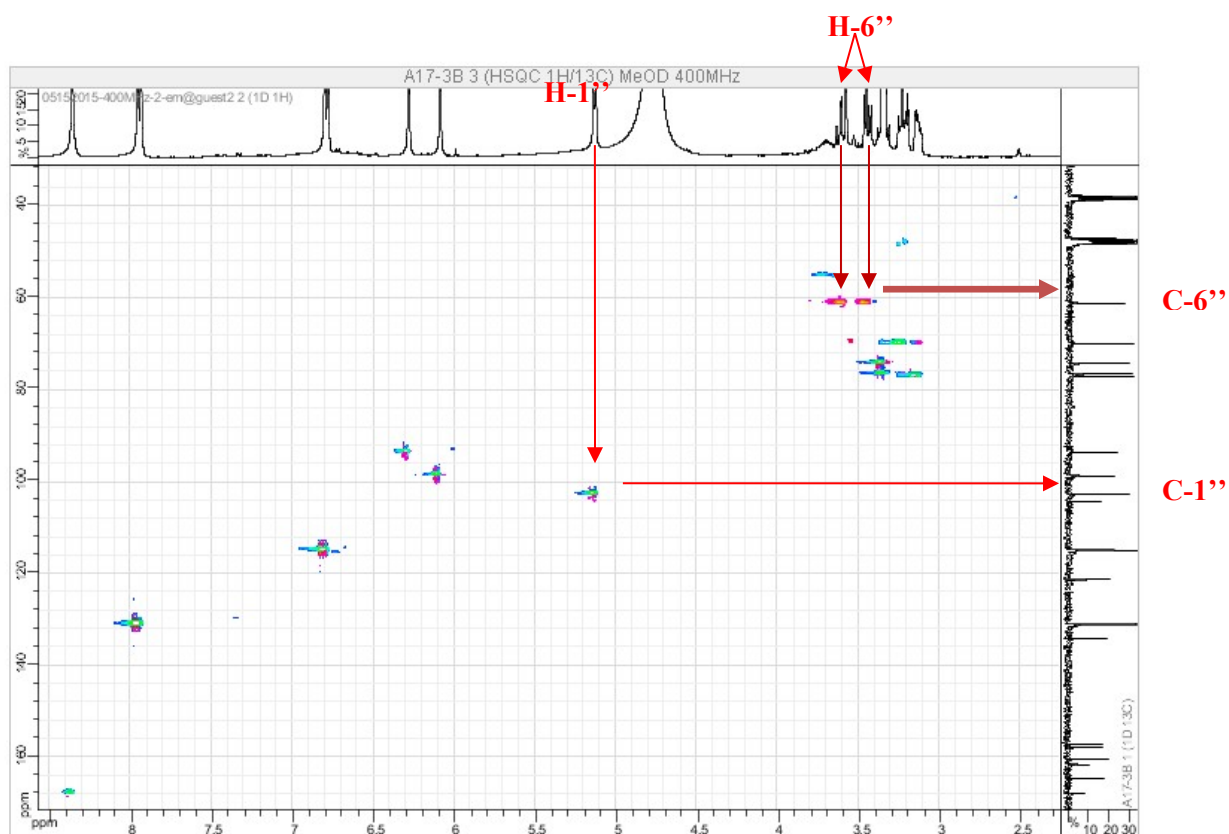

**Figure.19.** HSQC spectrum (400MHz, CD<sub>3</sub>OD, δppm) of astragaline

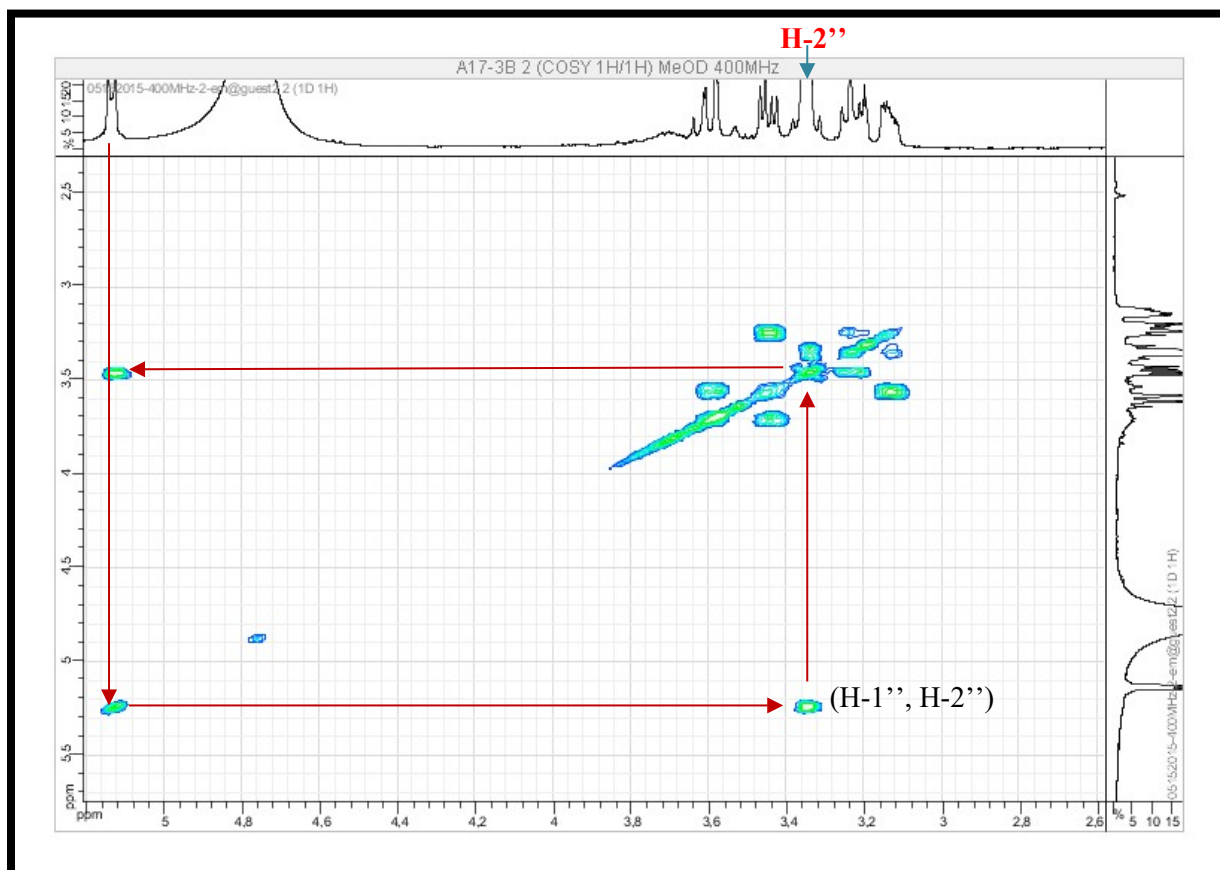

**Figure.20.** COSY spectrum (400MHz, CD<sub>3</sub>OD, δppm) of astragaline

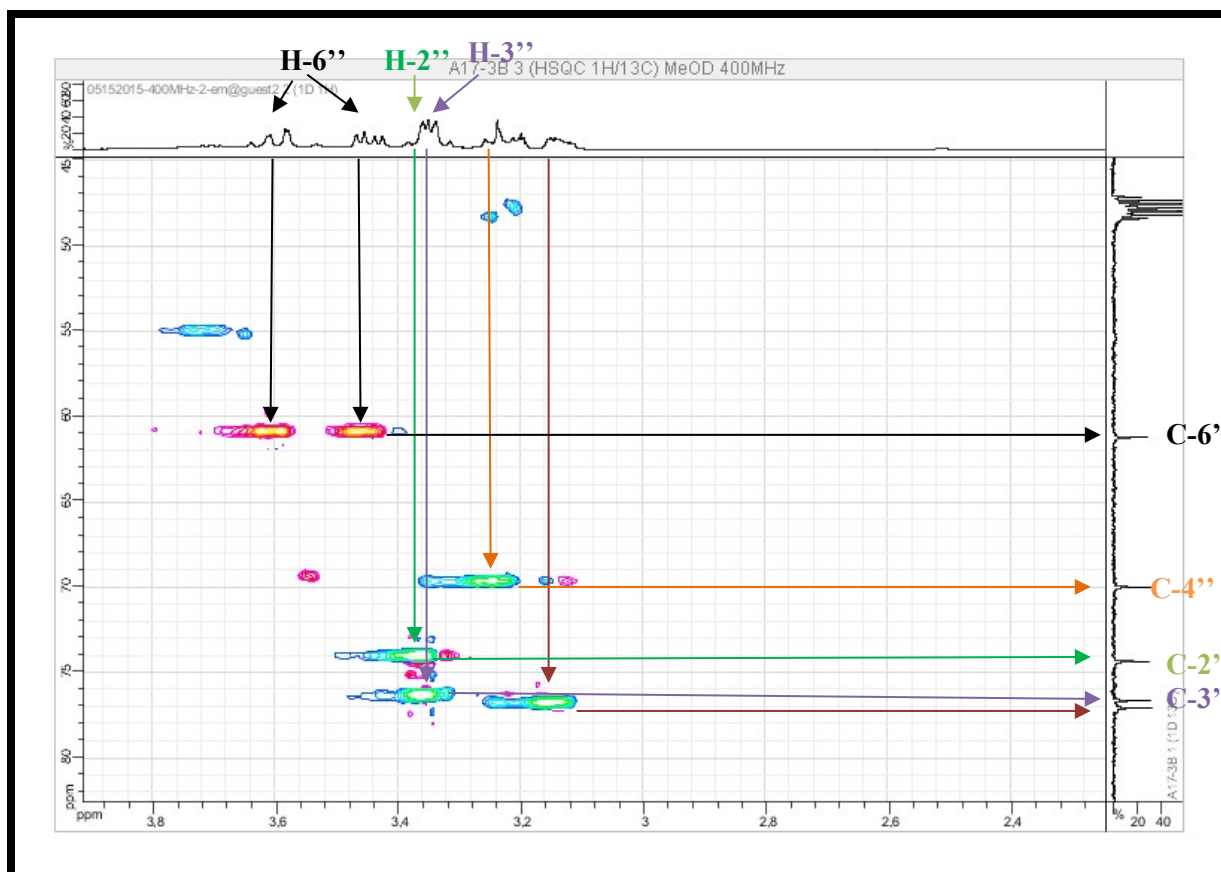

**Figure.21.** HSQC spectrum (400MHz, CD<sub>3</sub>OD, δppm) of astragalinal

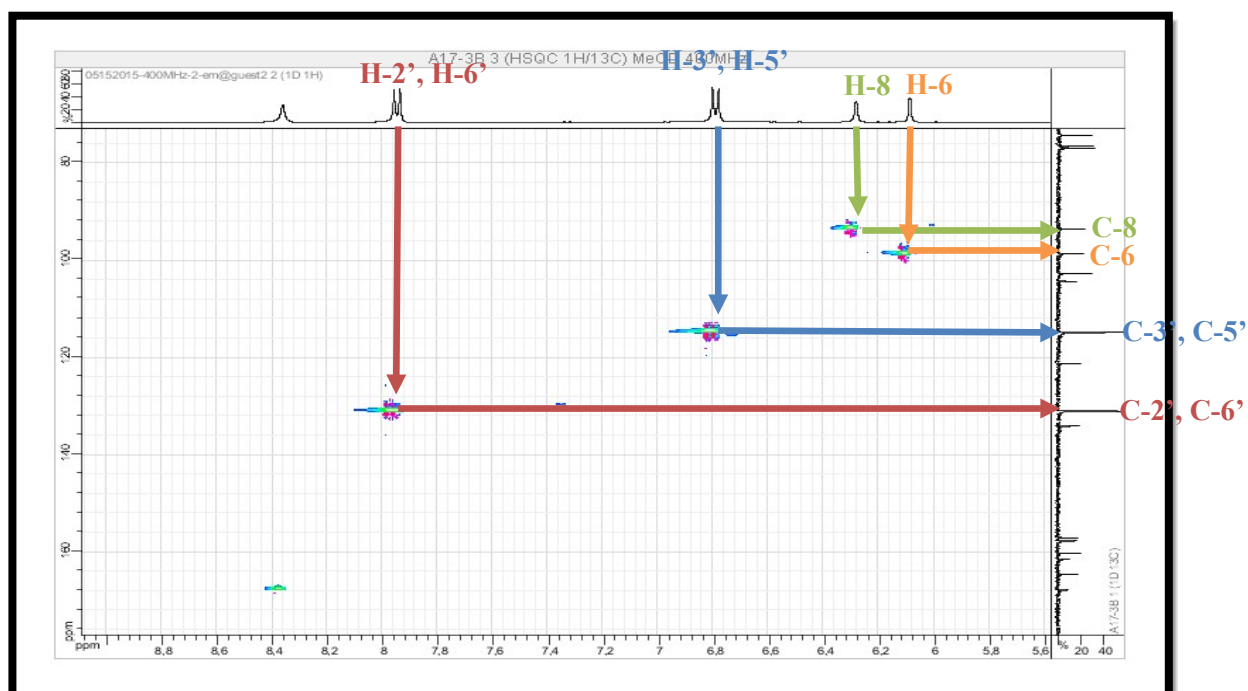

**Figure.22.** HSQC spectrum (spreading out 1) (400MHz, CD<sub>3</sub>OD, δppm) of astragalinal

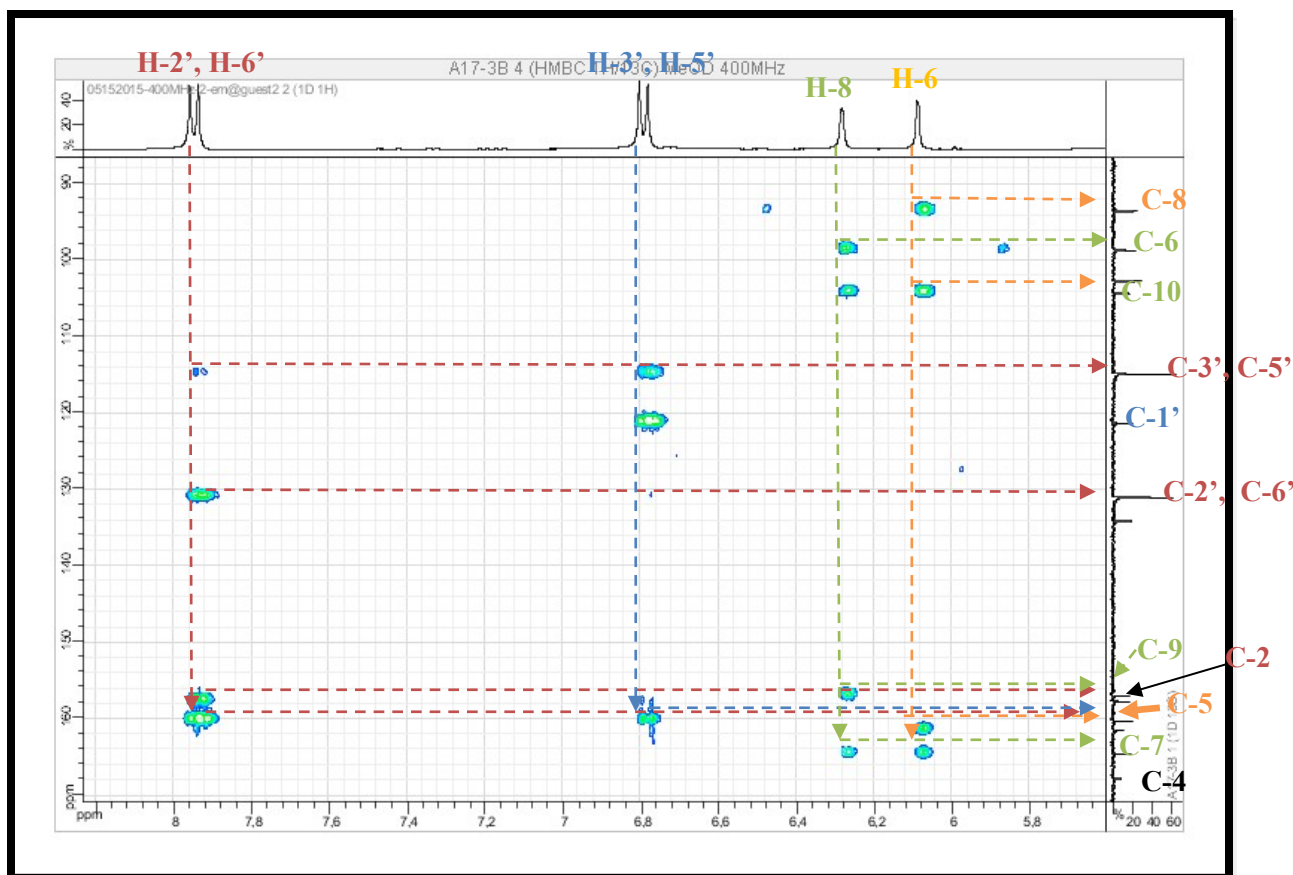

**Figure.23.** HMBC spectrum (spreading out1) (400MHz, CD<sub>3</sub>OD, δppm) of astragalin

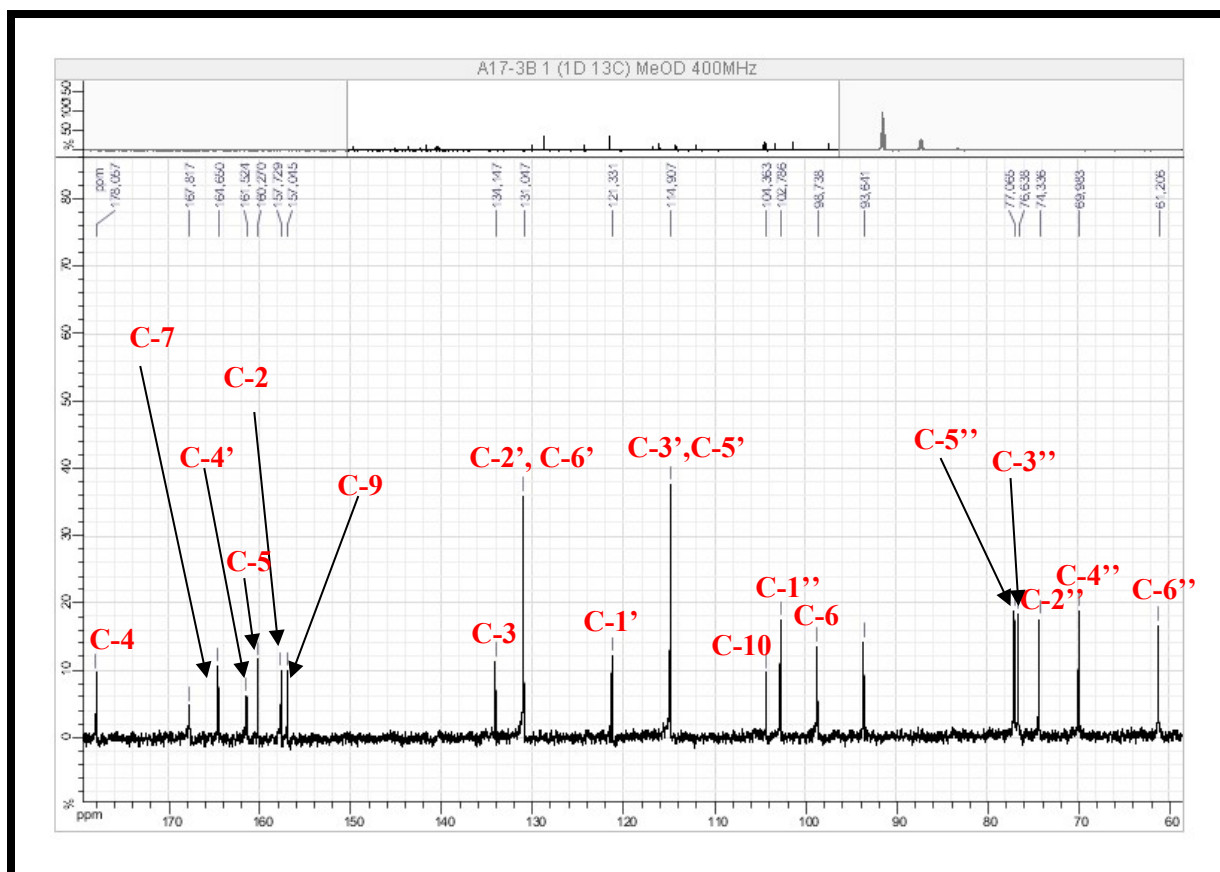

Figure.24.  $^{13}\text{C}$  spectrum (100MHz,  $\text{CD}_3\text{OD}$ ,  $\delta\text{ppm}$ ) of astragalinal

### Molecule 5: *Trans*-tiliroside

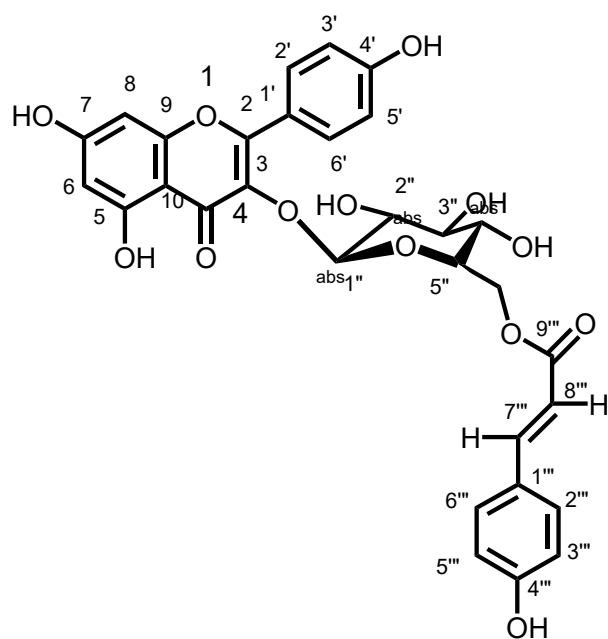



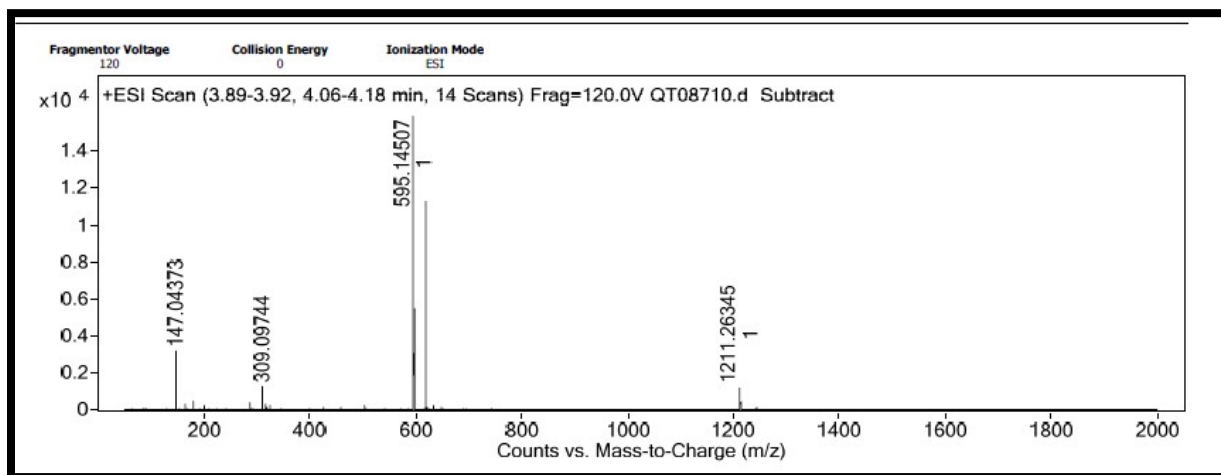

Figure.25.HRESI-MS (+) of *trans*-tiliroside

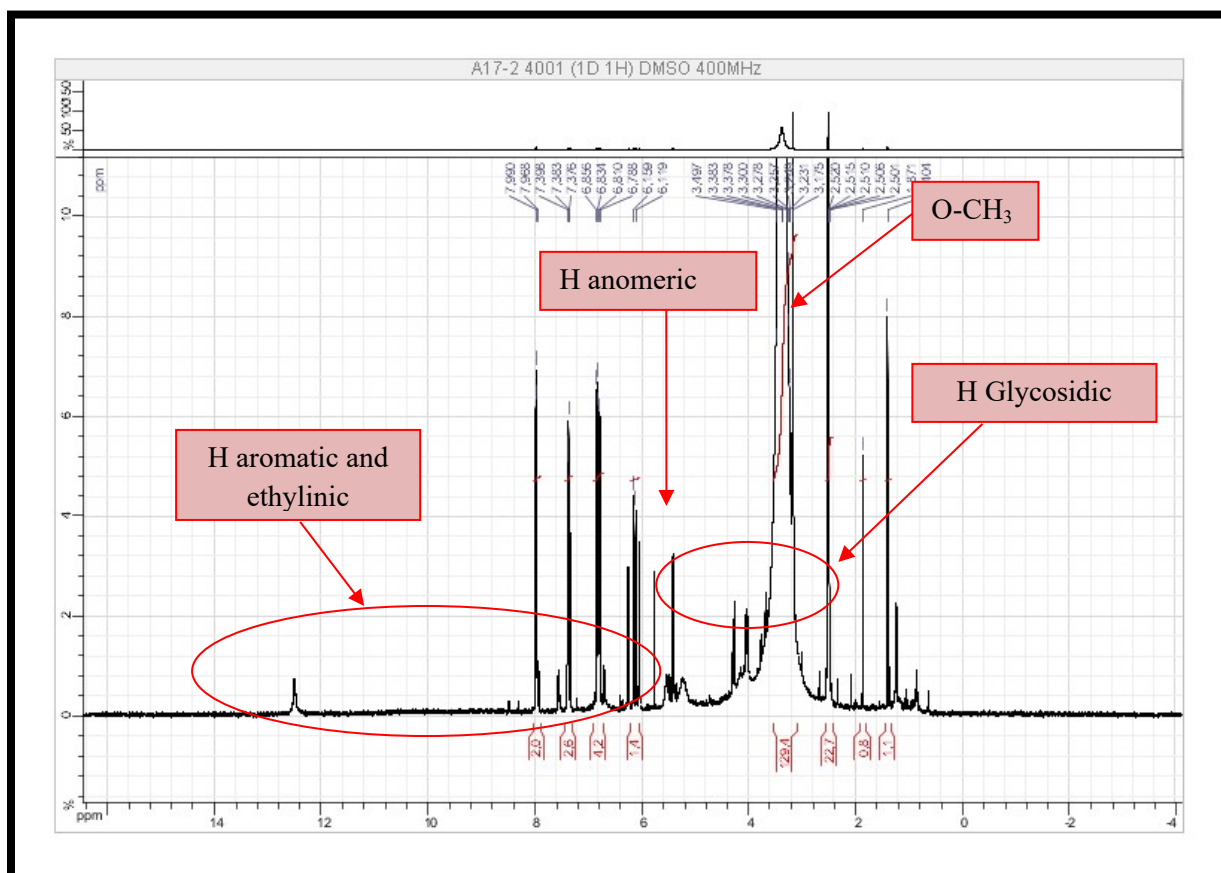

Figure.26. <sup>1</sup>H NMR spectrum (400MHz, DMSO-d<sub>6</sub>,  $\delta$ ppm) of *trans*-tiliroside

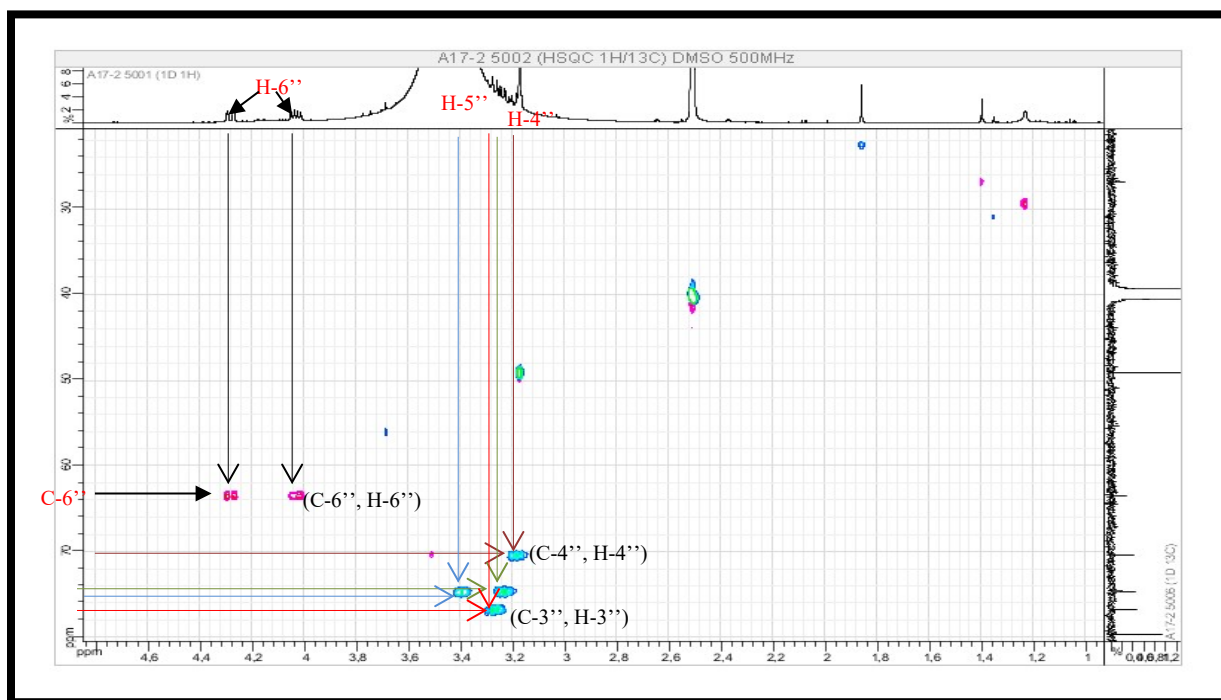

**Figure .27.** HSQC spectrum (spreading out 1) (500MHz, DMSO-d<sub>6</sub>, δppm) of *trans*-tiliroside

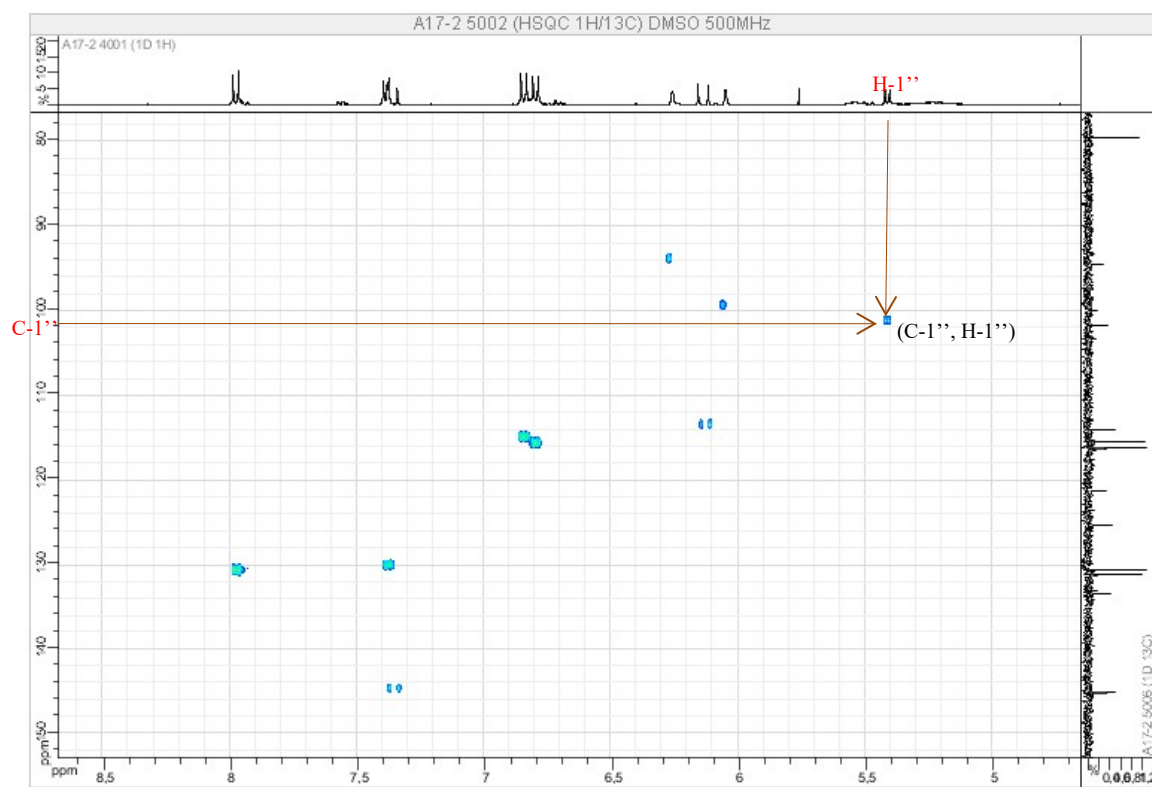

**Figure.28.** HSQC spectrum (spreading out 2) (500MHz, DMSO-d<sub>6</sub>, δppm) of *trans*-

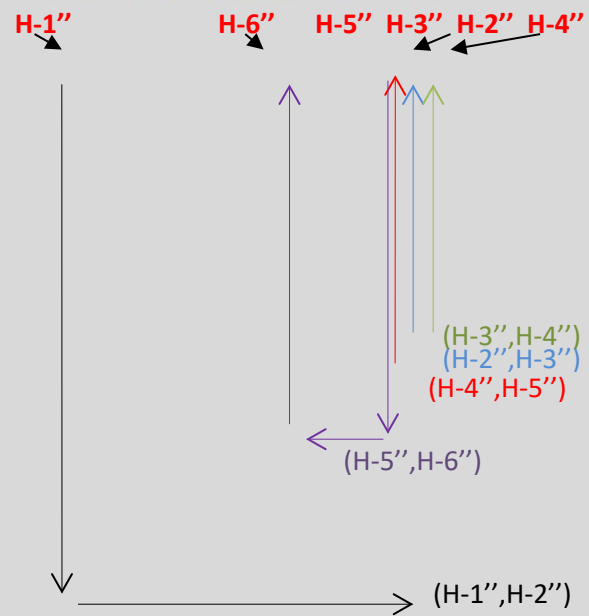

**Figure.29.** COSY spectrum (spreading out 1) (500MHz, DMSO-d<sub>6</sub>, δppm) of *trans*-tiliroside

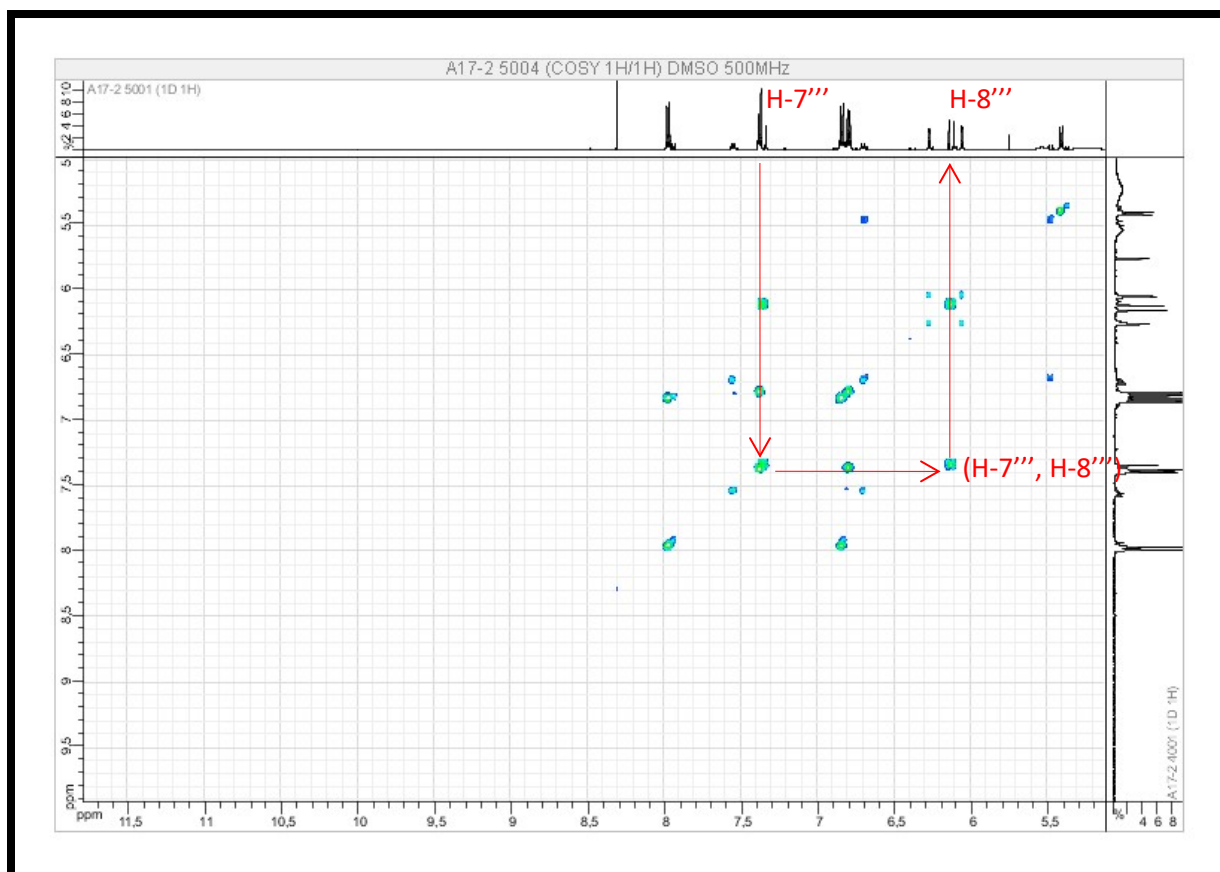

**Figure.30.** COSY spectrum (spreading out 2) (500MHz, DMSO-d<sub>6</sub>, δppm) of *trans*-tiliroside

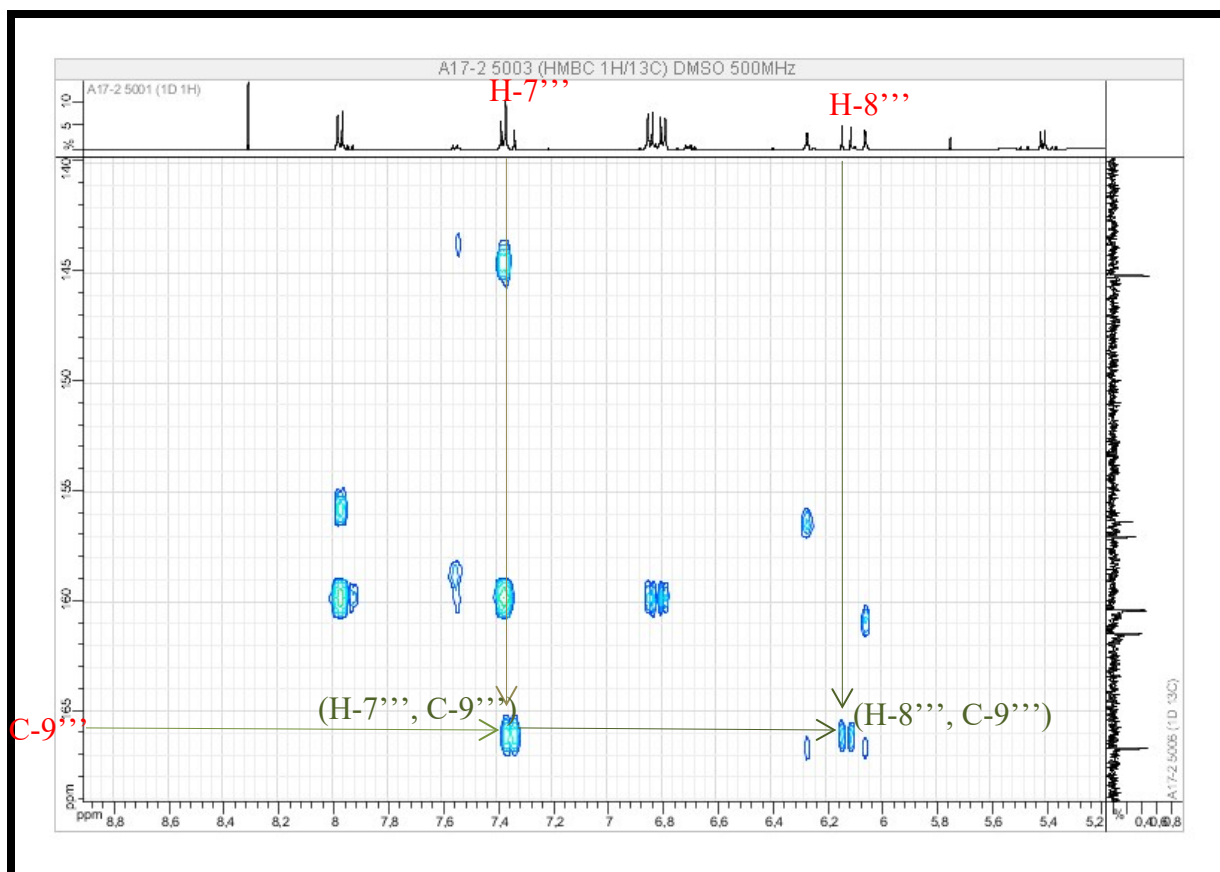

**Figure .31.** HMBC spectrum (spreading out 1) (500MHz, DMSO-d<sub>6</sub>, δppm) of *trans*-tiliroside

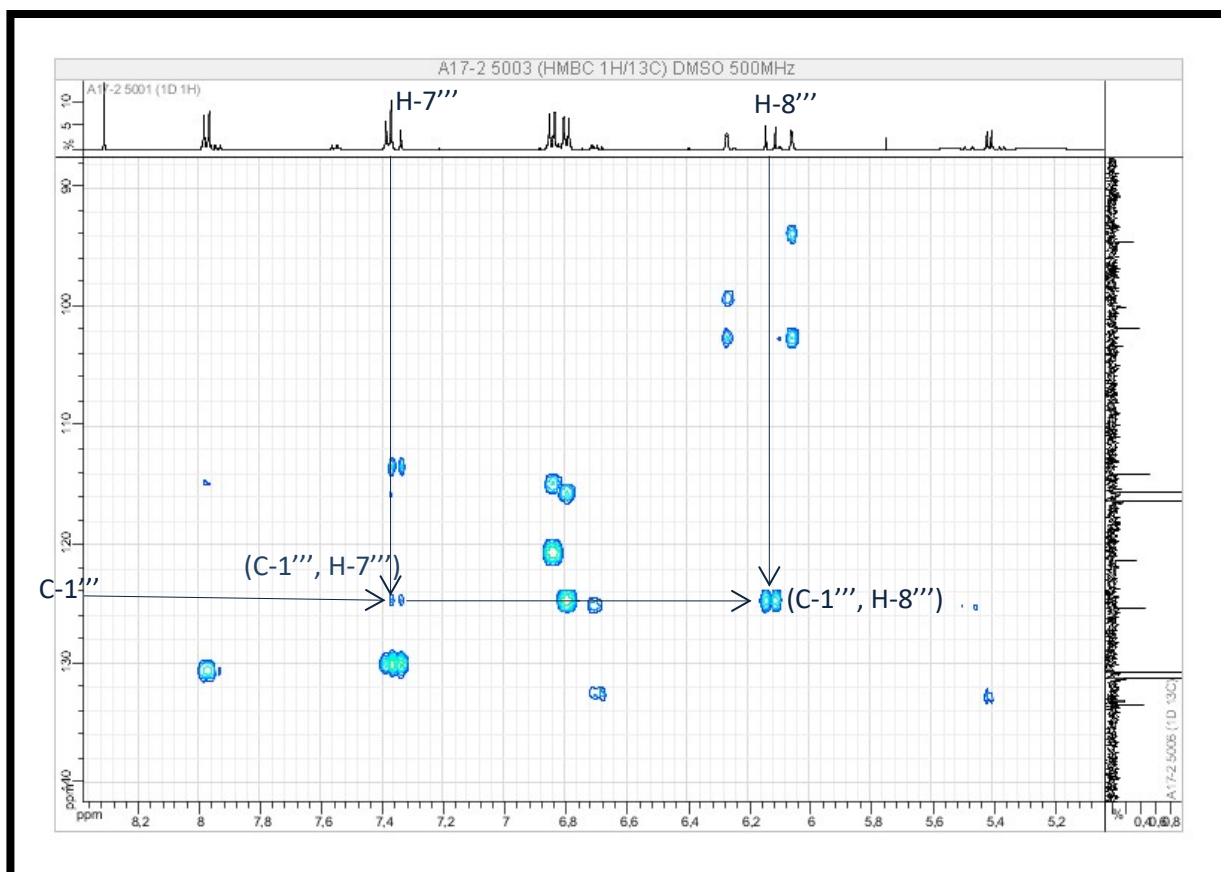

**Figure.32.** HMBC spectrum (spreading out 2) (500MHz, DMSO-d<sub>6</sub>, δppm) of *trans*-tiliroside

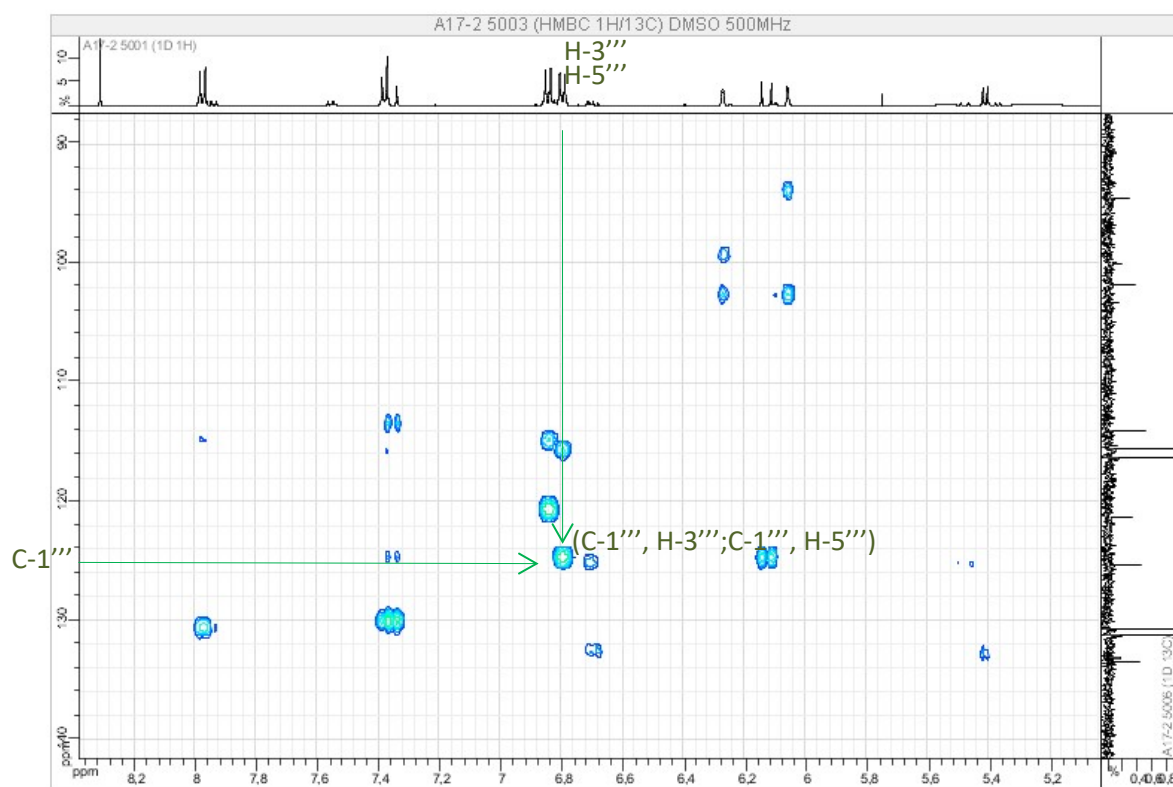

**Figure.33.** HMBC spectrum (spreading out 3) (500MHz, DMSO-d<sub>6</sub>, δppm) of *trans*-tiliroside

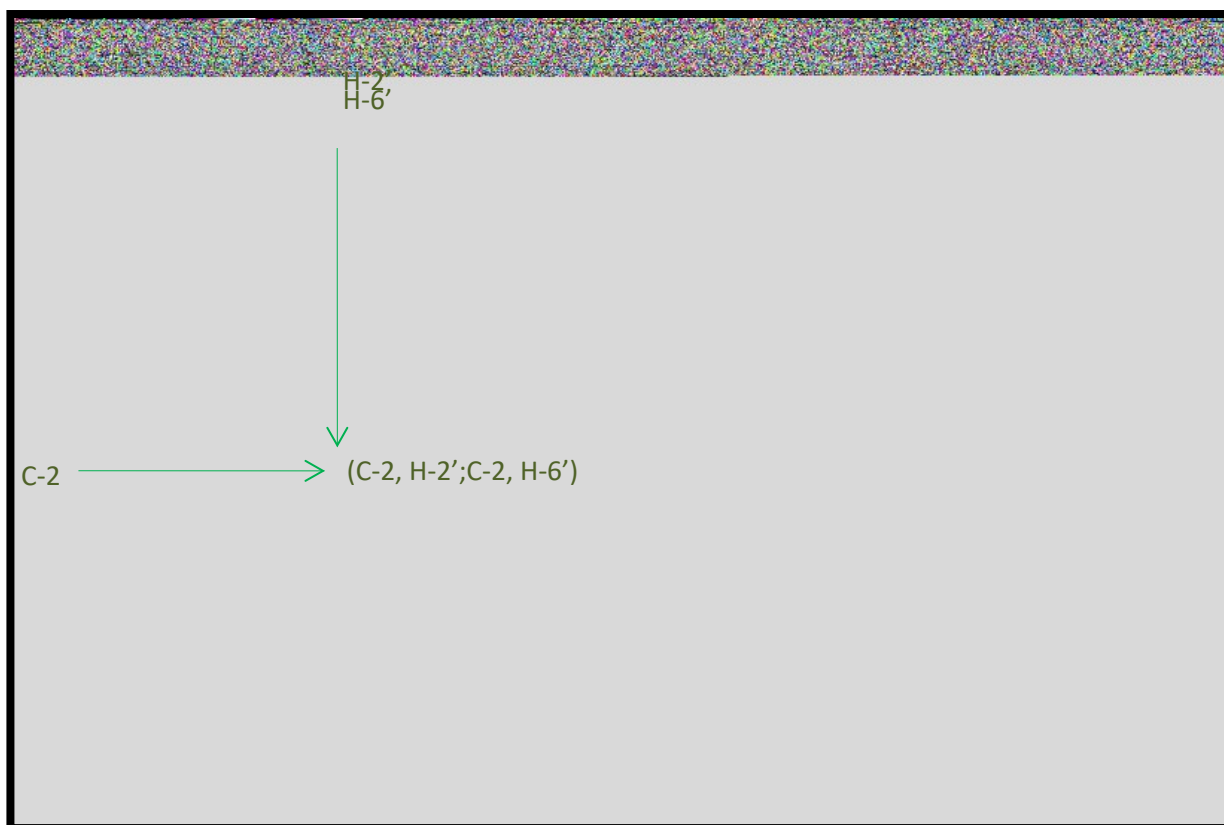

**Figure.34.** HMBC spectrum (spreading out 4) (500MHz, DMSO-d<sub>6</sub>, δppm) of *trans*-tiliroside

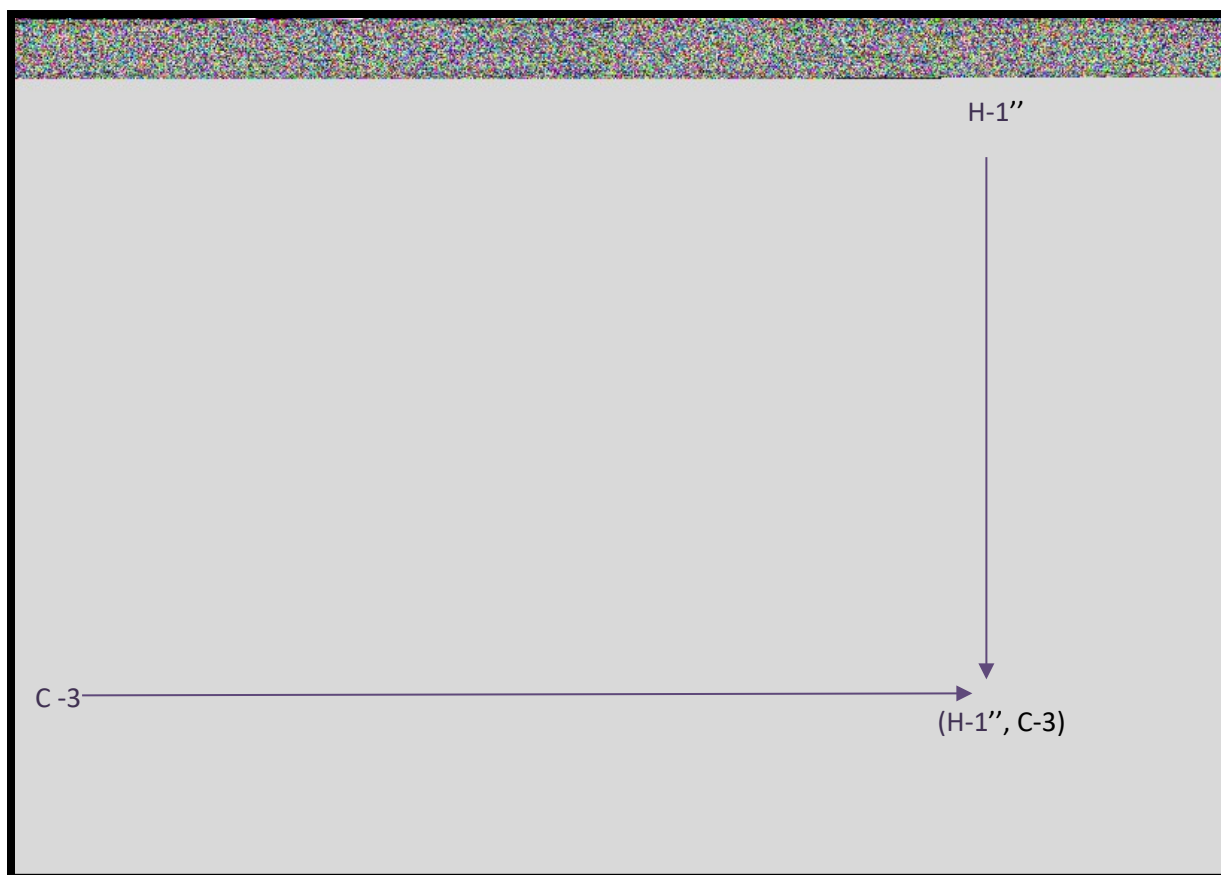

**Figure.35.**HMBC spectrum (spreading out 5) (500MHz, DMSO-d<sub>6</sub>, δppm) of *trans*-tiliroside



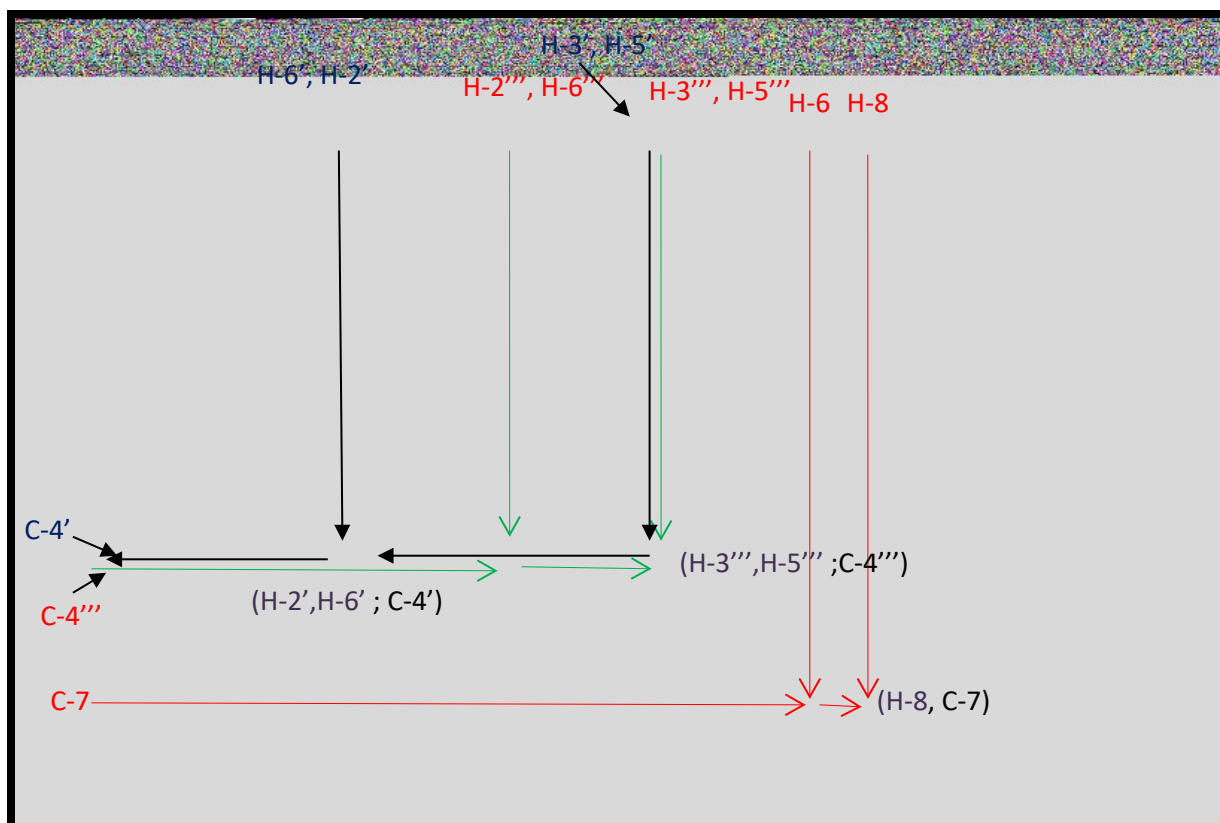

**Figure.36.**HMBC spectrum (spreading out 6) (500MHz, DMSO-d<sub>6</sub>, δppm) of *trans*-tiliroside

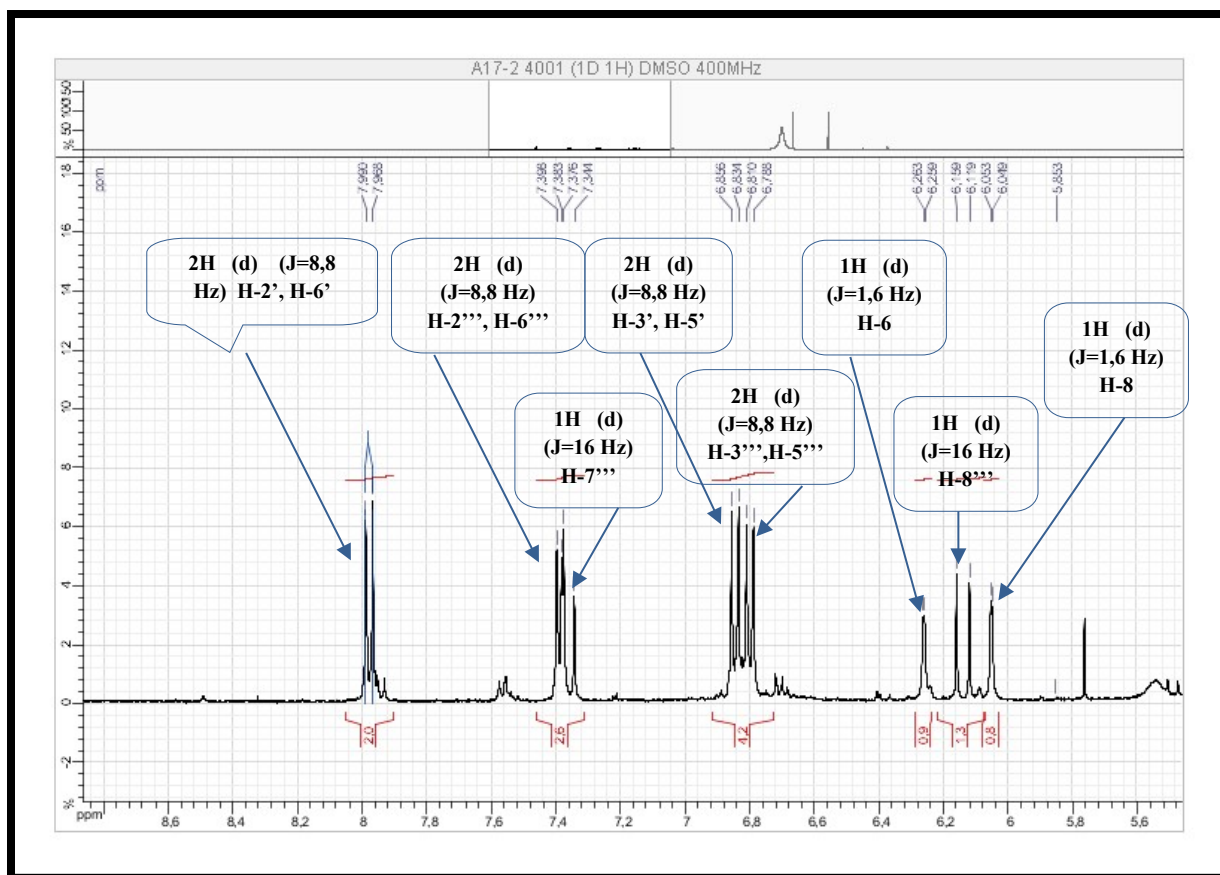

**Figure.37.**  $^1\text{H}$  NMR spectrum (400MHz, DMSO- $d_6$ ,  $\delta$ ppm) of *trans*-tiliroside

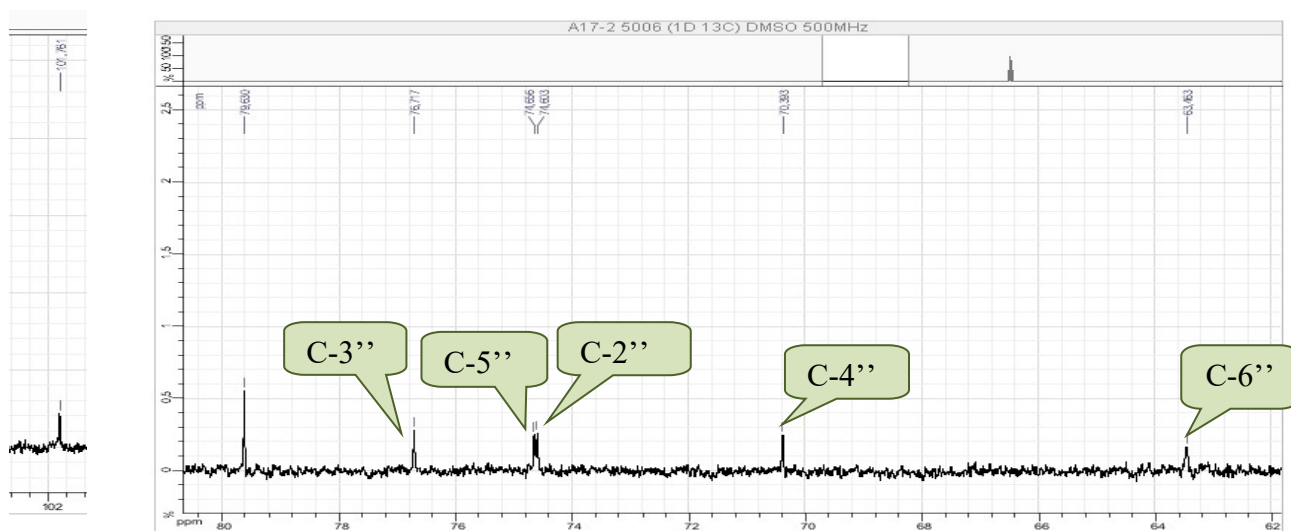

**Figure.38.**  $^{13}\text{C}$  NMR spectrum (spreading out 1) (125MHz, DMSO- $d_6$ ,  $\delta$ ppm) of *trans*-tiliroside

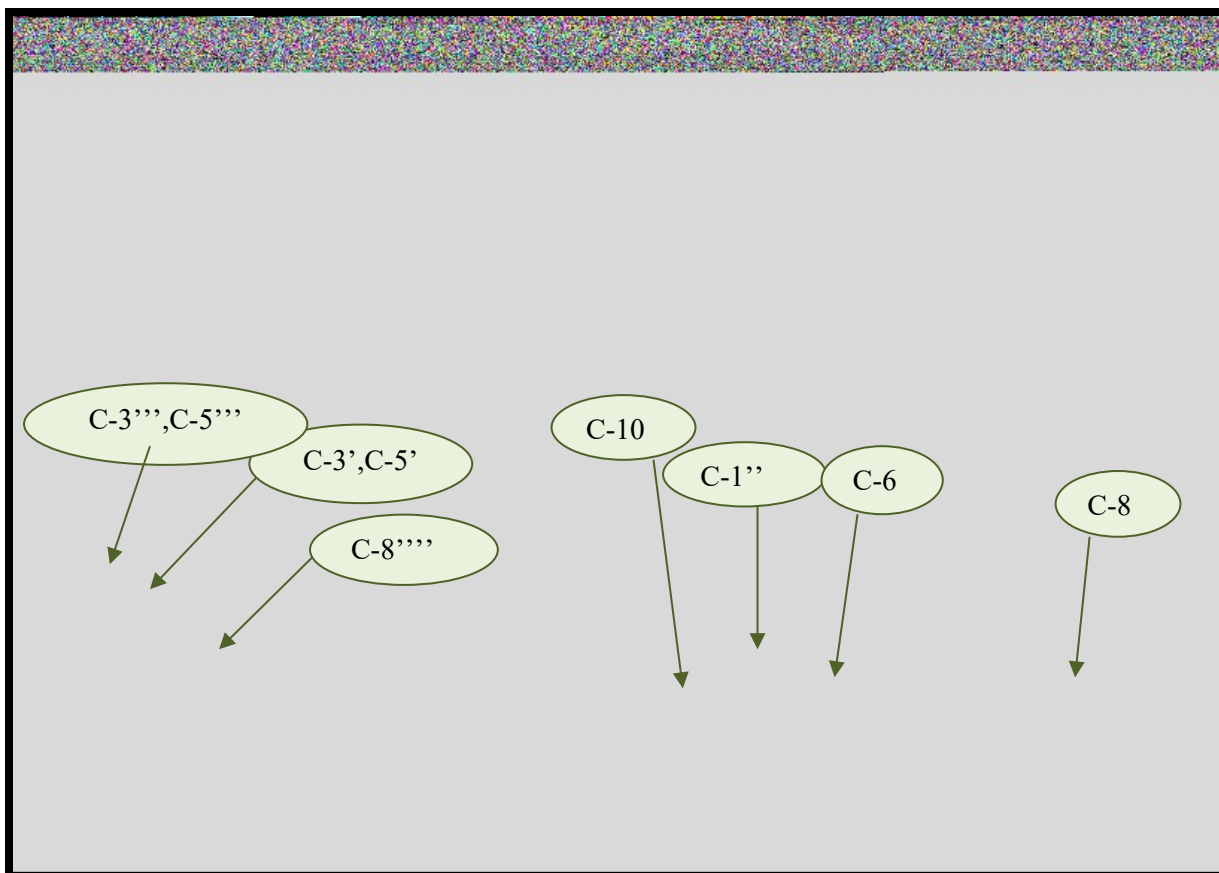

**Figure.39.**  $^{13}\text{C}$  NMR spectrum (spreading out 2) (125MHz, DMSO- $\text{d}_6$ ,  $\delta\text{ppm}$ ) of *trans*-tiliroside

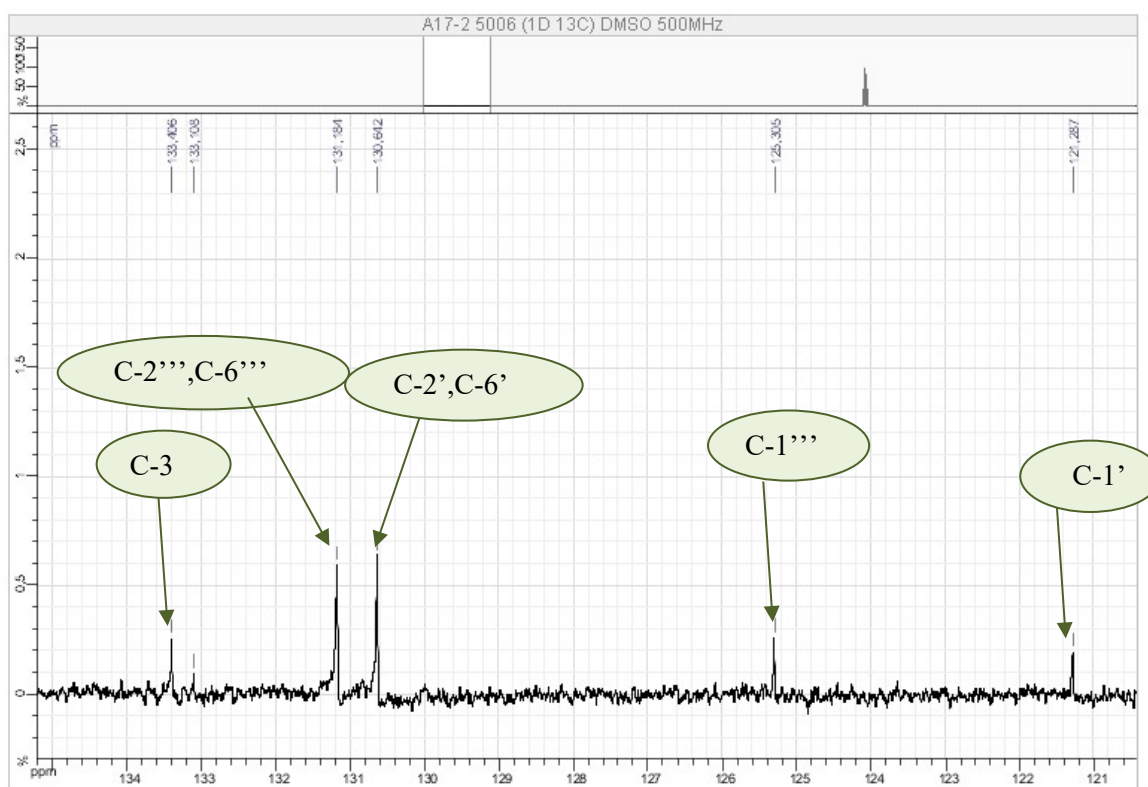

**Figure.40.**  $^{13}\text{C}$  NMR spectrum (spreading out 3) (125MHz, DMSO- $\text{d}_6$ ,  $\delta\text{ppm}$ ) of *trans*-tiliroside

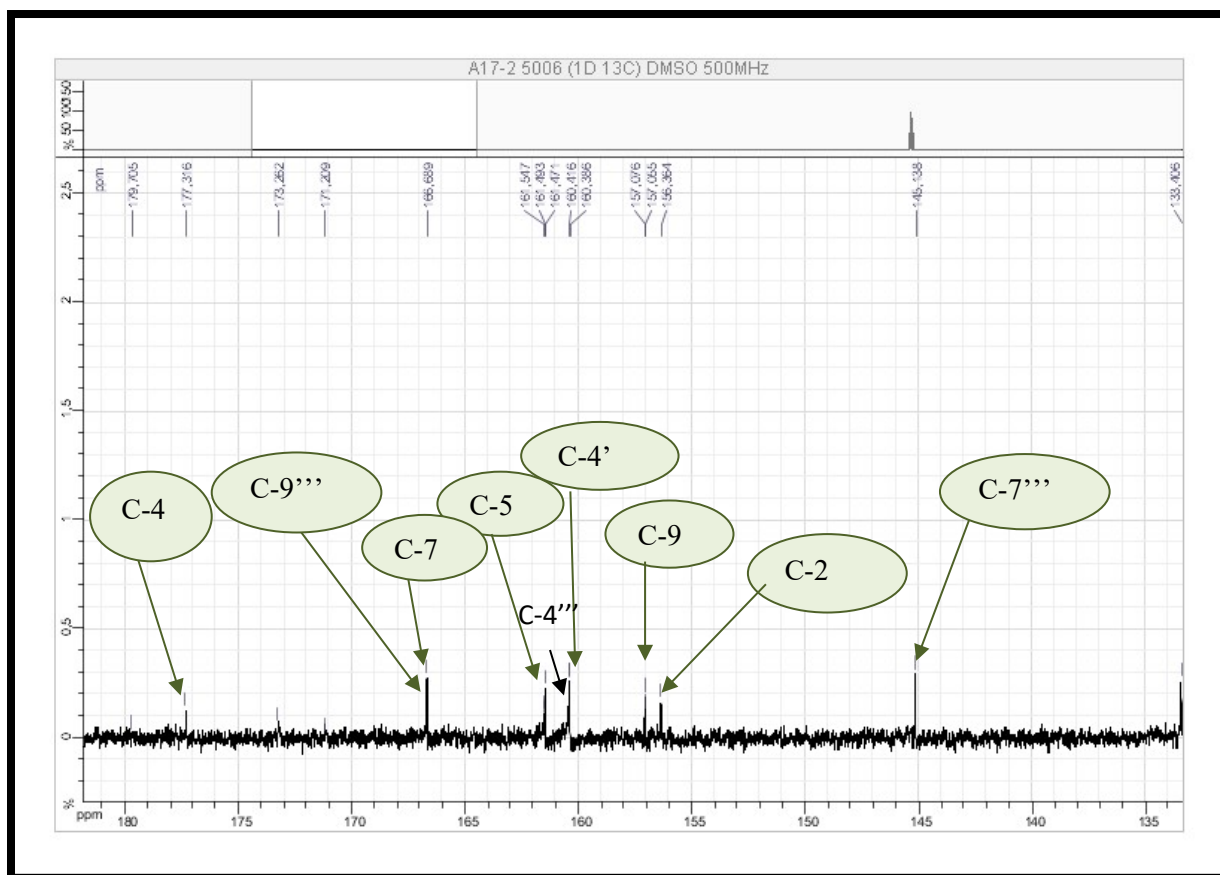

**Figure.41.**  $^{13}\text{C}$  NMR spectrum (spreading out 4) (125MHz,  $\text{DMSO-d}_6$ ,  $\delta\text{ppm}$ ) of *trans*-tiliroside

### Molecule 5 : *Cis*-tiliroside

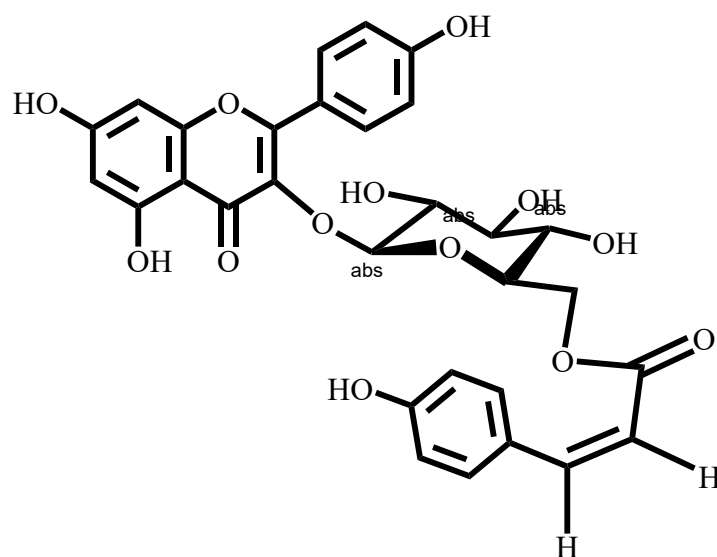

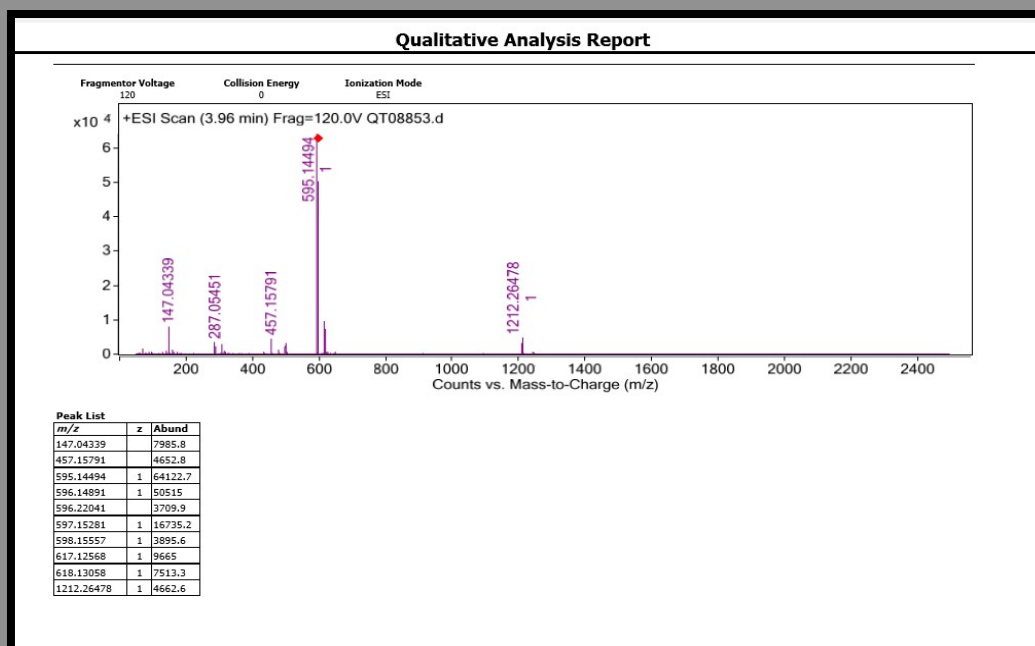

**Figure.42.** HRESI-MS (+) of *cis*-tiliroside

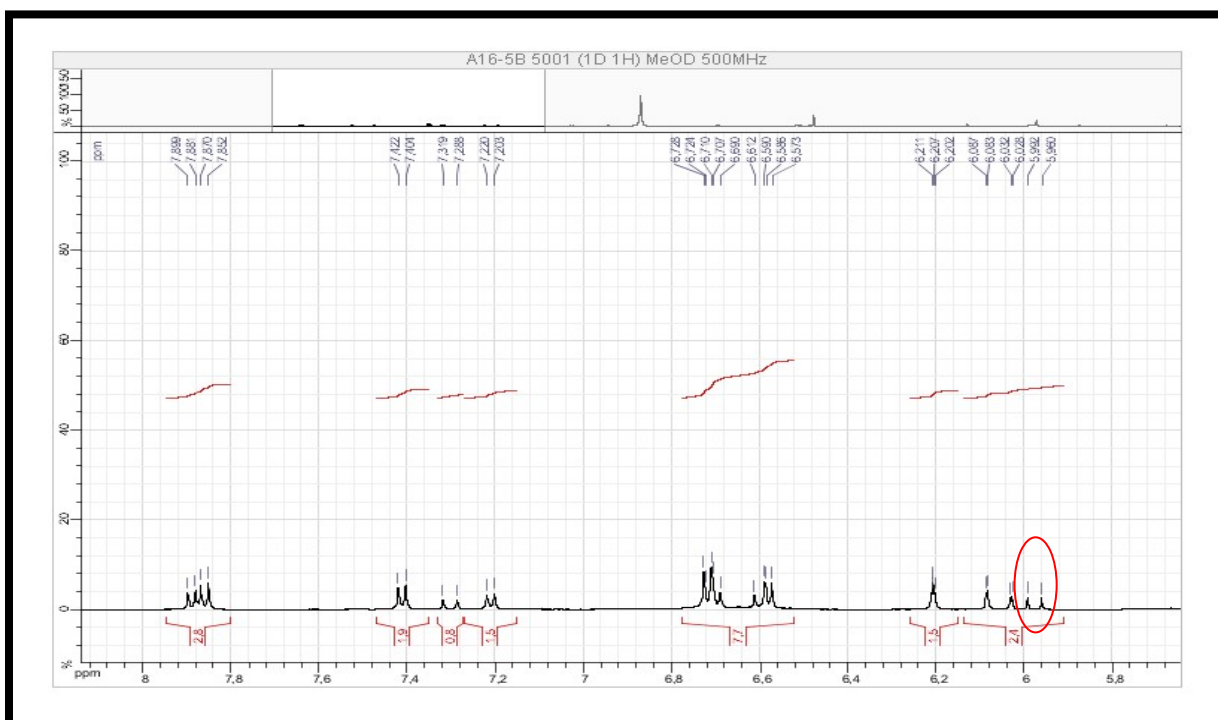

**Figure.43.** <sup>1</sup>H NMR spectrum (spreading out1) (500MHz, CD<sub>3</sub>OD, δppm) of *cis*-tiliroside

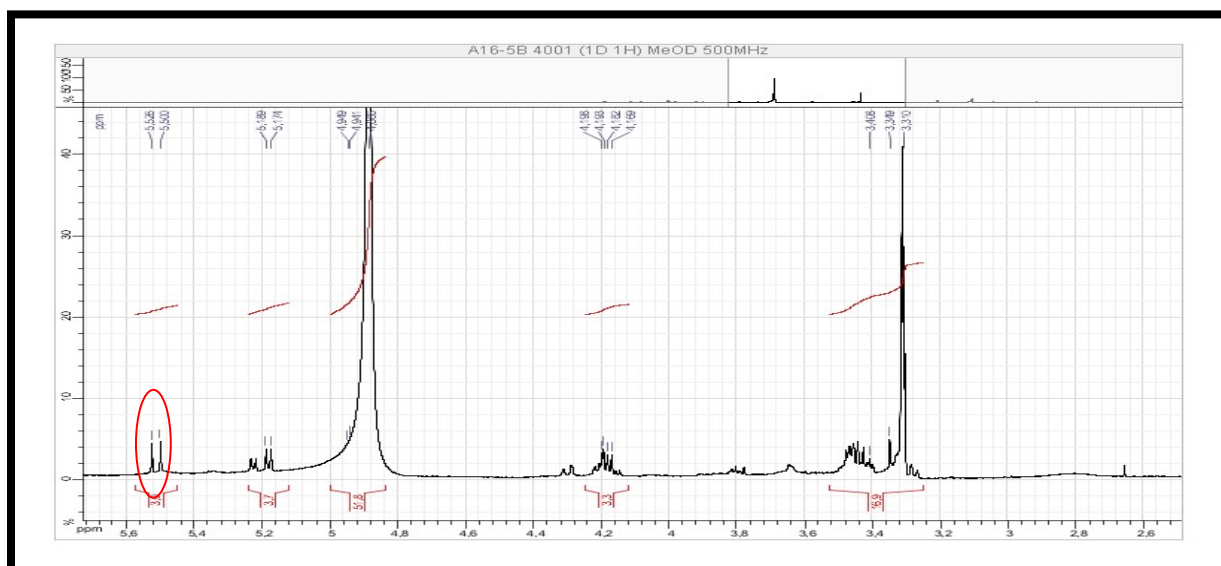

**Figure.44.**  $^1\text{H}$  NMR spectrum (spreading out 2) (500MHz,  $\text{CD}_3\text{OD}$ ,  $\delta\text{ppm}$ ) of *cis*-tiliroside

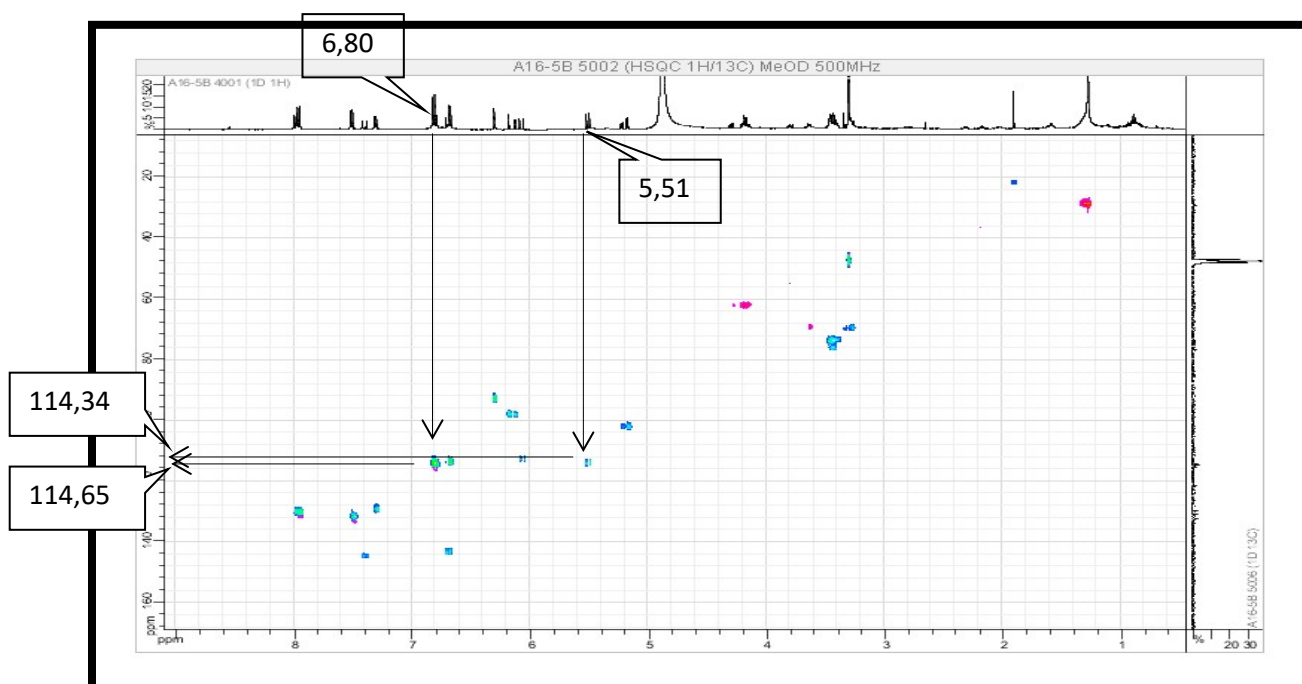

**Figure.45.** HSQC NMR spectrum (500MHz,  $\text{CD}_3\text{OD}$ ,  $\delta\text{ppm}$ ) of *cis*-tiliroside

**Molecule 7 :** 3-oxo- $\alpha$ -ionol- $\beta$ -D-glucopyranoside

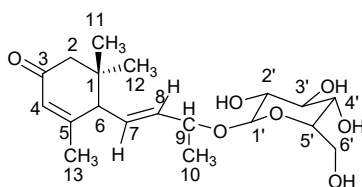

(7)

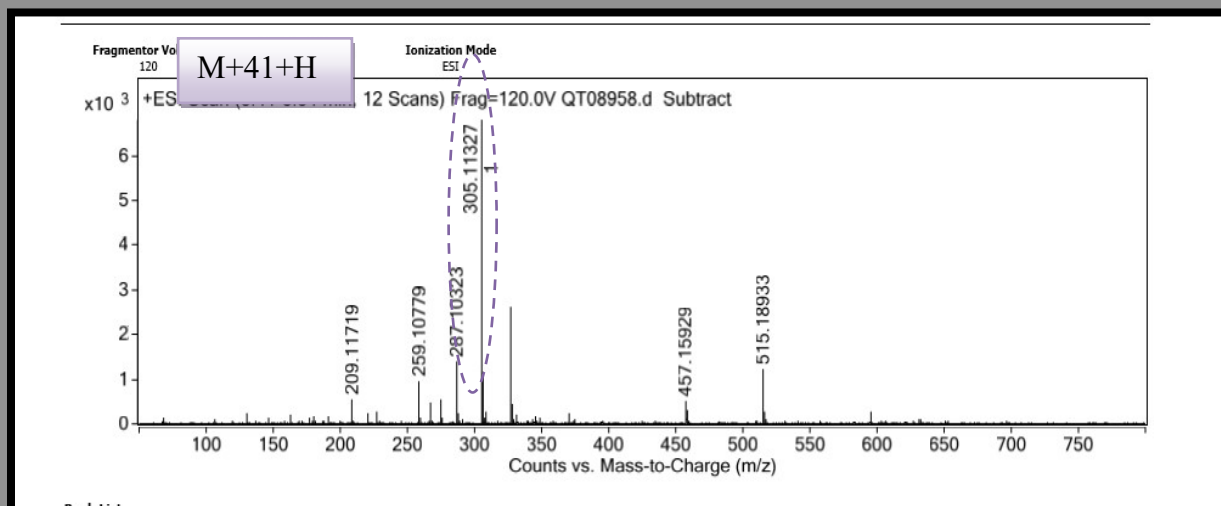

Figure.46.HRESI-MS (+) of 3-oxo- $\alpha$ -ionol- $\beta$ -D-glucopyranoside

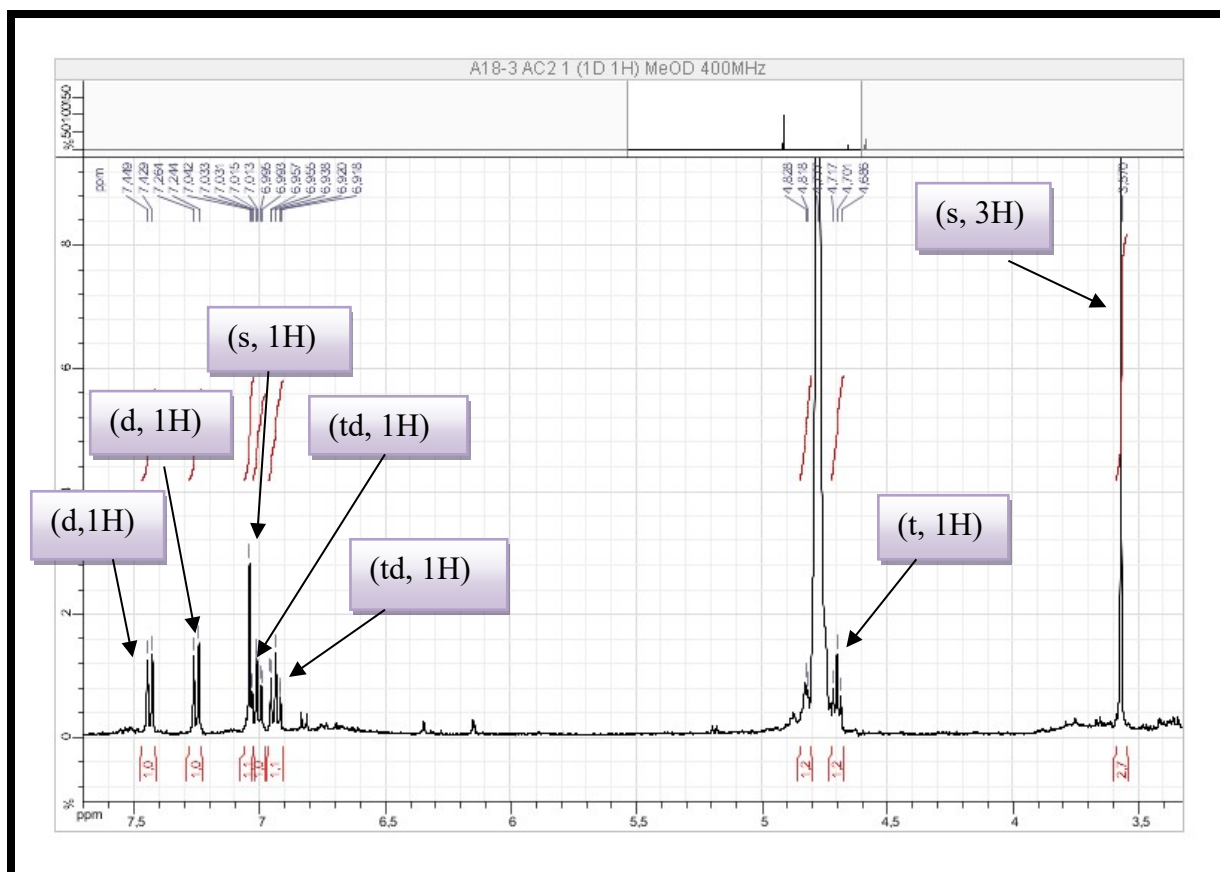

**Figure.47-1.**  $^1\text{H}$  NMR spectrum (spreading out1) (400MHz,  $\text{CD}_3\text{OD}$ ,  $\delta_{\text{ppm}}$ ) of 3-oxo- $\alpha$ -ionol- $\beta$ -D-glucopyranoside

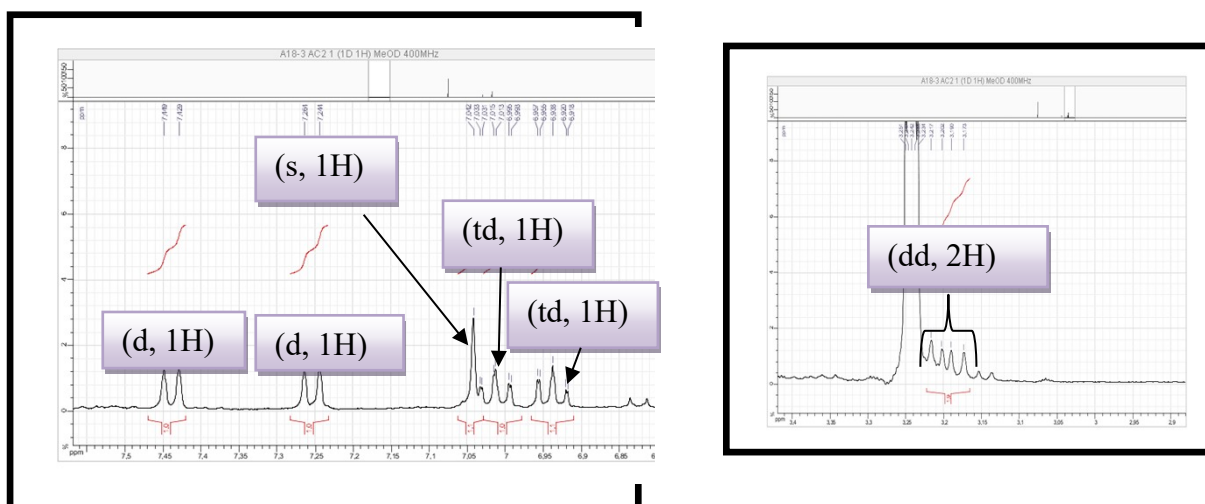

**Figure.47-2.**  $^1\text{H}$  NMR spectrum (spreading out2) (400MHz,  $\text{CD}_3\text{OD}$ ,  $\delta_{\text{ppm}}$ ) of 3-oxo- $\alpha$ -ionol- $\beta$ -D-glucopyranoside



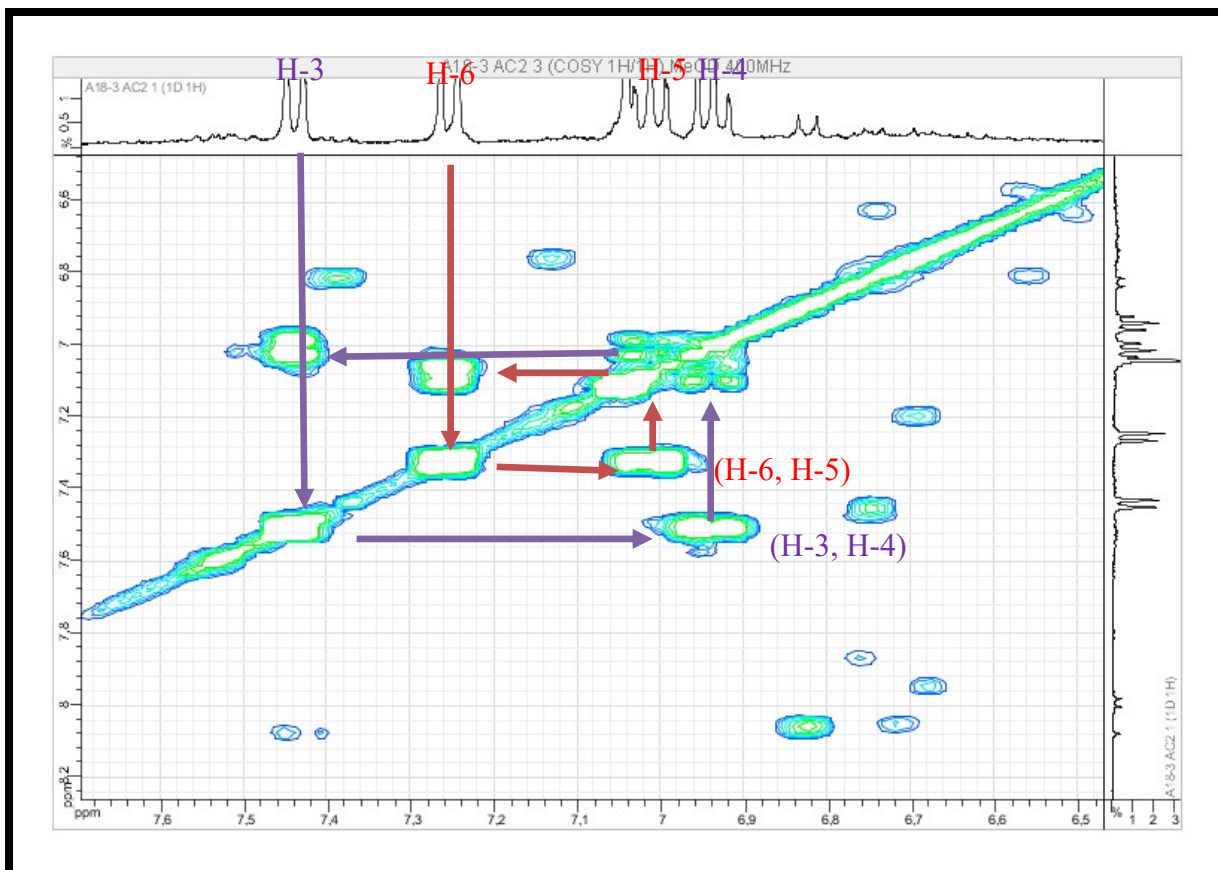

**Figure.48-1.** COSY spectrum (spreading out 1) (400MHz,  $\text{CD}_3\text{OD}$ ,  $\delta_{\text{ppm}}$ ) of 3-oxo- $\alpha$ -ionol- $\beta$ -D-glucopyranoside

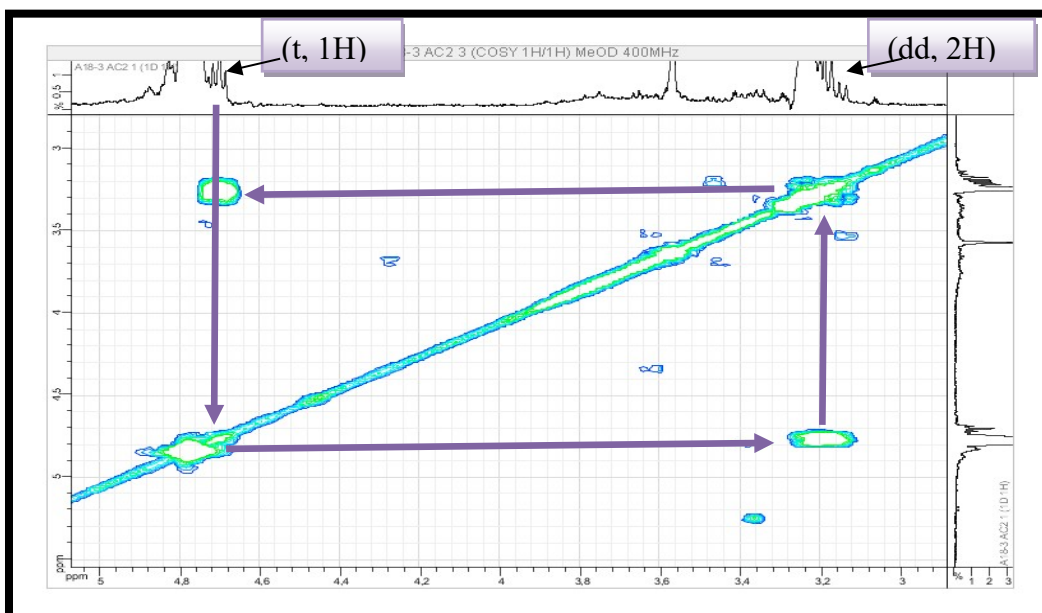

**Figure.48-2.** COSY spectrum (spreading out 2) (400MHz,  $\text{CD}_3\text{OD}$ ,  $\delta_{\text{ppm}}$ ) of 3-oxo- $\alpha$ -ionol- $\beta$ -D-glucopyranoside

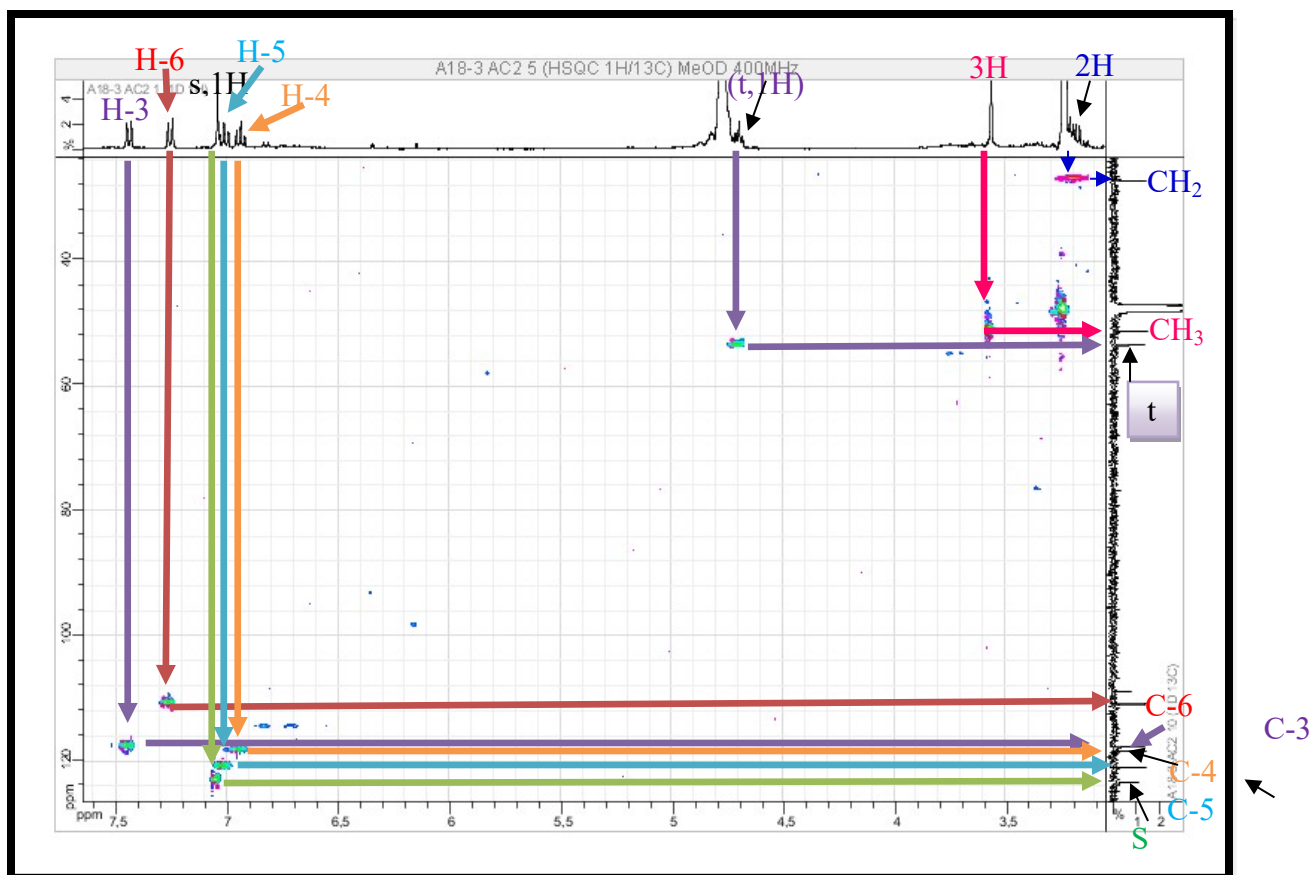

**Figure.49.** HSQC spectrum (spreading out 1) (400MHz,  $\text{CD}_3\text{OD}$ ,  $\delta_{\text{ppm}}$ ) of 3-oxo- $\alpha$ -ionol- $\beta$ -D-glucopyranoside

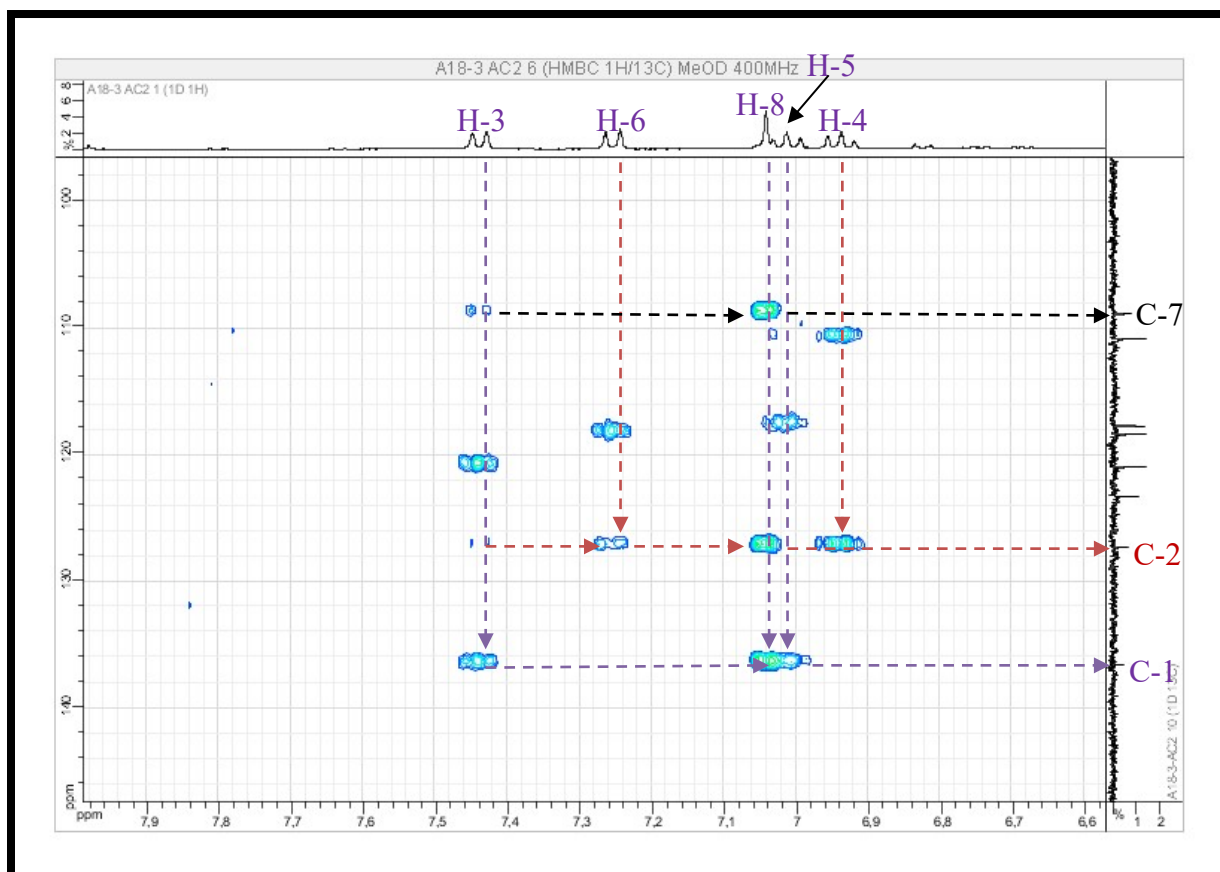

**Figure.50-1.** HMBC spectrum (spreading out 1) (400MHz, CD<sub>3</sub>OD, δ<sub>ppm</sub>) of 3-oxo-α-ionol-β-D-glucopyranoside

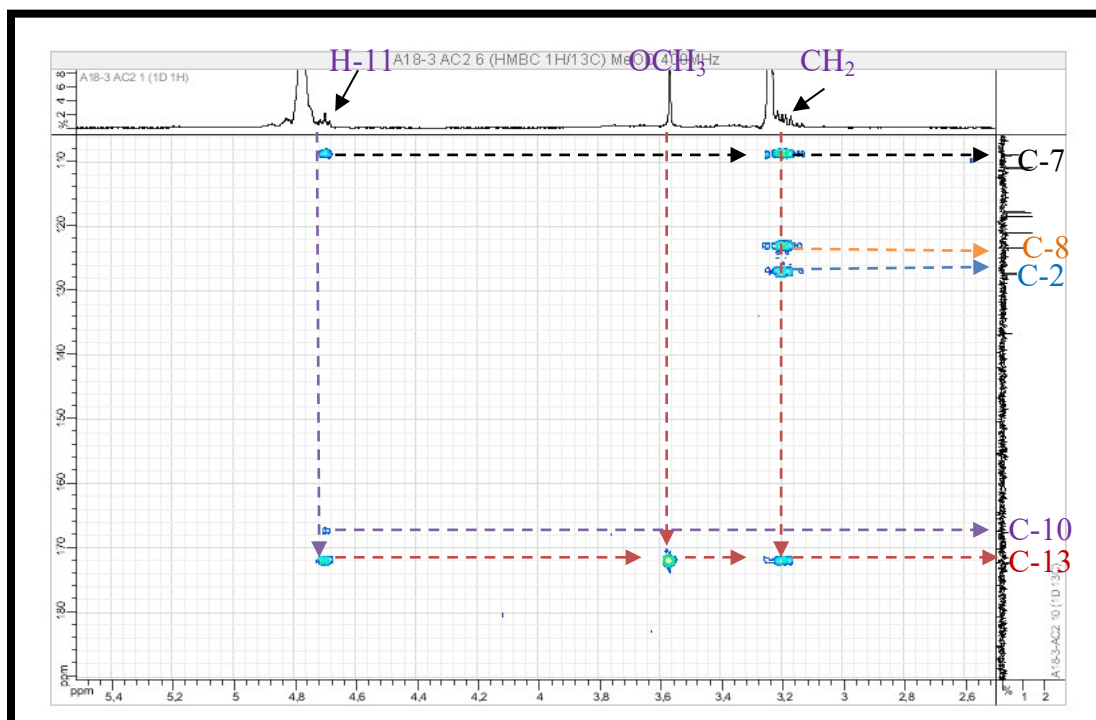

**Figure.50-2.** HMBC spectrum (spreading out 2) (400MHz, CD<sub>3</sub>OD, δ<sub>ppm</sub>) of 3-oxo-α-ionol-β-D-glucopyranoside

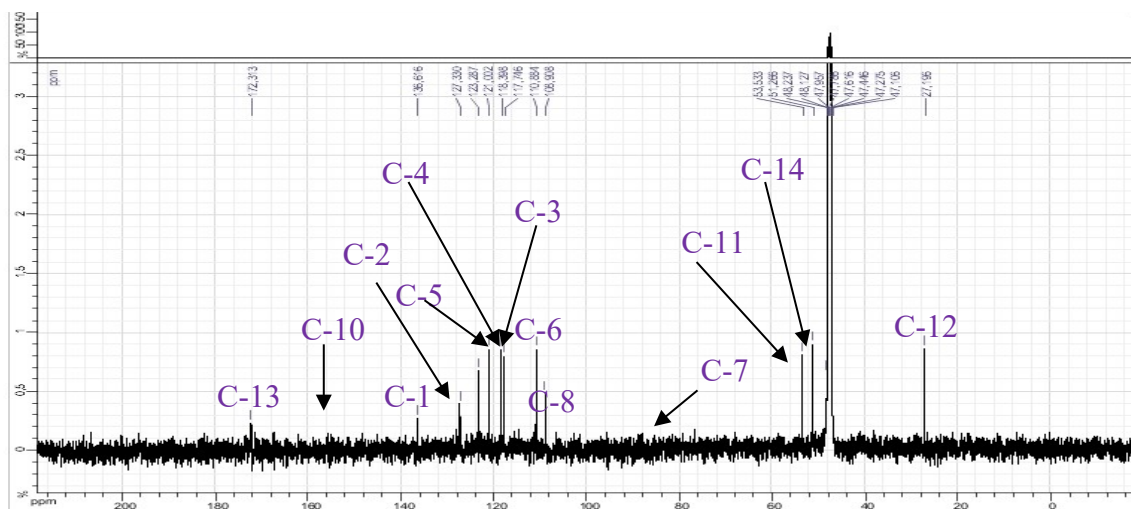

**Figure.51.**  $^{13}\text{C}$  NMR spectrum (100MHz,  $\text{CD}_3\text{OD}$ ,  $\delta_{\text{ppm}}$ ) of 3-oxo- $\alpha$ -ionol- $\beta$ -D-glucopyranoside
